# Supplementary material for: Akkermansia muciniphila and its outer protein Amuc_1100 regulates tryptophan metabolism in colitis
Source: Royal Society of Chemistry journal article supplement (doi:10.1039/d1fo02172a), 2021-01-01
Supplement: d1fo02172a4.pdf [file d1fo02172a4.pdf]

**Multimomics reveal the regulation of tryptophan metabolism by *Akkermansia muciniphila* in colitis**

Zhenyang Gu<sup>1‡</sup>, Wenlong Pei<sup>1‡</sup>, Yonghua Shen<sup>2‡</sup>, Lijuan Wang<sup>1</sup>, Jun Zhu<sup>1</sup>, Yi Zhang<sup>1</sup>,  
Shengxian Fan<sup>3</sup>, Qian Wu<sup>1</sup>, Lei Li<sup>1\*</sup>, Zhan Zhang<sup>1\*</sup>

<sup>1</sup> Center for Global Health, School of Public Health, Nanjing Medical University, 101 Longmian Avenue, Nanjing 211166, P.R. China

<sup>2</sup> Department of Gastroenterology, The Affiliated Drum Tower Hospital of Nanjing University Medical School, Nanjing, Jiangsu 210008, P. R. China.

<sup>3</sup> Department of General Surgery, Nanjing Drum Tower Hospital, Medical School of Nanjing University, Nanjing 210008, China

## Supplementary material

**Figure S1.** Method developed to measure the indicated Trp metabolites by ultra-performance liquid chromatography-Q Exactive hybrid quadrupole-orbitrap mass spectrometer (UPLC-Q Exactive MS), the indicated Trp metabolites ( $\mu\text{g/ml}$ ) were spiked into serum, and the elution time for each was obtained.

**Figure S2.** Partial least squares discrimination analysis (PLS-DA) of metabolic profiling from colitis and control. (A) PLS-DA score plot between UC patients and healthy control. (B) PLS-DA score plot among control, DSS, DSS+ pasteurised *Akk* and DSS+Amuc\_1100 group.

**Figure S3. Integration of faecal microbiota and serum metabolomes identified a UC-associated network.** The genus (top 50) identified as significantly differential between patients with UC and healthy controls and differential serum metabolites involved in Trp metabolism pathways were included. A positive correlation between the nodes is indicated by red connecting lines, and a negative correlation is indicated by green. Thicker lines indicate a larger correlation coefficient ( $p < 0.05$ ). Higher taxonomy of genera (phylum) were Trp metabolites that are indicated by coloured dots.

**Table S1.** Differential metabolites between patients with UC and healthy controls.

**Table S2.** Differential metabolites between colitis mice induced by DSS and controls.

**Table S3.** Enriched pathways in colitis mice induced by DSS in comparison with controls.

**Table S4.** Enriched pathways in colitis mice upon pasteurised *Akk* treatment.

**Table S5.** Enriched pathways in colitis mice upon Amuc\_1100 treatment.

**Table S6.** Enriched GO terms in colitis mice induced by DSS in comparison with controls.

**Table S7.** Enriched GO terms in colitis mice upon pasteurised *Akk* treatment.

**Table S8.** Enriched GO terms in colitis mice upon Amuc\_1100 treatment.
