# Supplementary material for: Akkermansia muciniphila and its outer protein Amuc_1100 regulates tryptophan metabolism in colitis
Source: Royal Society of Chemistry journal article supplement (doi:10.1039/d1fo02172a), 2021-01-01
Supplement: d1fo02172a5.xlsx [file d1fo02172a5.xlsx]

## Sheet: Table S1
Table S1. Differential metabolites between UC patients and healthy control
HMDB	metabolites	VIP	FoldChange (UC/control)	p.t	p.BH
HMDB0010737	(R)-3-Hydroxy-Octadecanoic acid	1.74975	0.629018	9.97e-05	0.00088265
HMDB0001961	1,7-Dimethylguanosine	1.78624	0.828756	3.58e-05	0.000424849
HMDB0006294	16-Hydroxy hexadecanoic acid	1.67494	0.685981	0.000256636	0.00167756
HMDB0006875	1-Pyrroline-2-carboxylic acid	1.41395	0.660965	0.0106946	0.0241896
HMDB0002234	1-Pyrroline-4-hydroxy-2-carboxylate	2.09513	0.69686	1.36e-05	0.000221536
HMDB0000378	2-Methylbutyroylcarnitine	1.76599	0.735016	4.15e-05	0.000478548
HMDB0000763	5-Hydroxyindoleacetic acid	1.16196	0.867831	0.00725277	0.0180588
HMDB0000472	5-Hydroxy-L-tryptophan	1.03694	0.854192	0.0191383	0.0364577
HMDB0000982	5-Methylcytidine	1.99362	0.716493	6.5e-05	0.000665372
HMDB0001308	5'-Phosphoribosyl-N-formylglycinamide	1.00218	0.46337	0.0186374	0.035897
HMDB0001388	Alpha-Linolenic acid	1.27761	0.642105	0.005573	0.0148448
HMDB0000510	Aminoadipic acid	1.87227	0.770162	1.5e-05	0.000239946
HMDB0028755	Aspartyl-Histidine	1.26056	0.863471	0.00920996	0.0218191
HMDB0003640	Beta-Leucine	1.84116	0.837561	1.66e-05	0.000252646
HMDB0003831	Beta-Tyrosine	1.53504	0.741367	0.000316168	0.00196309
HMDB0028770	Cysteinyl-Asparagine	1.1	1.09579	0.0191407	0.0364577
HMDB0001032	Dehydroepiandrosterone sulfate	1.03778	0.703419	0.023273	0.0414869
HMDB0002028	DOPA sulfate	1.50397	0.722591	0.00089205	0.00409075
HMDB0001274	dTDP	1.15512	0.873518	0.0116396	0.0257173
HMDB0011741	gamma-Glutamyltyrosine	1.75006	0.688252	3.1e-05	0.000389961
HMDB0001514	Glucosamine	1.42159	1.13097	0.0267421	0.0454139
HMDB0028832	Glutamylvaline	2.49593	0.600885	5.65e-10	3.95e-07
HMDB0012233	Glutarate semialdehyde	1.34277	0.761816	0.00228119	0.00803701
HMDB0003157	Guanidinosuccinic acid	2.03668	0.80249	9.3e-06	0.000184274
HMDB0003290	Gulonic acid	1.24485	0.871762	0.0153089	0.0312965
HMDB0002354	Hawkinsin	1.71947	0.752431	6.35e-05	0.000656702
HMDB0000714	Hippuric acid	1.66154	0.469488	0.00198835	0.00724061
HMDB0002331	Imidazoleacetic acid riboside	1.82009	0.506957	0.00022902	0.00155088
HMDB0001190	Indoleacetaldehyde	2.20199	0.765423	1.46e-07	1.04e-05
HMDB0000682	Indoxyl sulfate	1.52905	0.574835	0.000532908	0.00279644
HMDB0011166	L-beta-aspartyl-L-leucine	2.36304	0.644771	5.77e-09	1.35e-06
HMDB0000641	L-Glutamine	1.91234	1.31436	9.56e-06	0.000184274
HMDB0000177	L-Histidine	2.14223	0.565691	4.17e-06	0.000105843
HMDB0000684	L-Kynurenine	1.25511	0.848284	0.00531654	0.0143253
HMDB0000182	L-Lysine	1.21903	0.890863	0.00852347	0.0205169
HMDB0000696	L-Methionine	1.13934	0.906067	0.0180187	0.0351104
HMDB0034365	L-Theanine	1.60955	2.05561	0.00123943	0.00528772
HMDB0000167	L-Threonine	1.4158	0.830954	0.0027805	0.0090592
HMDB0000929	L-Tryptophan	1.19155	0.854488	0.00936003	0.0220502
HMDB0000883	L-Valine	1.25679	0.908623	0.0120695	0.0264998
HMDB0010381	LysoPC(15:0)	2.03661	0.665555	1.22e-06	4.92e-05
HMDB0010389	LysoPC(18:4(6Z,9Z,12Z,15Z))	1.19747	0.841748	0.0149191	0.0307313
HMDB0010392	LysoPC(20:2(11Z,14Z))	1.43852	0.808635	0.00247779	0.00848107
HMDB0010393	LysoPC(20:3(5Z,8Z,11Z))	1.52822	0.746426	0.000532824	0.00279644
HMDB0010395	LysoPC(20:4(5Z,8Z,11Z,14Z))	1.07206	0.832348	0.014906	0.0307313
HMDB0010404	LysoPC(22:6(4Z,7Z,10Z,13Z,16Z,19Z))	1.21163	0.819355	0.0142967	0.0298298
HMDB0010407	LysoPC(P-16:0)	1.57142	0.786019	0.000309814	0.001947
HMDB0011473	LysoPE(0:0/16:0)	1.48974	0.558515	0.00427747	0.0124527
HMDB0011482	LysoPE(0:0/20:1(11Z))	1.68019	0.736962	0.000114491	0.000965124
HMDB0011493	LysoPE(0:0/22:4(7Z,10Z,13Z,16Z))	1.86591	0.742439	1.6e-05	0.000252646
HMDB0011538	MG(0:0/18:2(9Z,12Z)/0:0)	1.0711	0.693181	0.0214447	0.0393121
HMDB0011738	N2-gamma-Glutamylglutamine	1.72213	1.35081	0.000104625	0.000902053
HMDB0013854	N4-Acetylsulfamethoxazole	1.78071	0.781252	4.54e-05	0.00051551
HMDB0001067	N-Acetylaspartylglutamic acid	1.46355	0.781006	0.000679946	0.00333696
HMDB0001367	N-Acetyl-glucosamine 1-phosphate	1.47291	0.84002	0.000973174	0.00438346
HMDB0000230	N-Acetylneuraminic acid	1.89622	0.752896	4.08e-05	0.000473153
HMDB0013010	N-Heptanoylglycine	1.41909	1.2322	0.0276559	0.0465888
HMDB0000782	Octadecanedioic acid	1.31758	0.801005	0.00449097	0.0127214
HMDB0002117	Oleamide	1.40978	0.668411	0.00170357	0.00652505
HMDB0000208	Oxoglutaric acid	1.85692	0.454923	1.33e-05	0.000219296
HMDB0000220	Palmitic acid	1.71681	0.83482	0.000161742	0.00123844
HMDB0000210	Pantothenic acid	1.55746	0.839243	0.0017271	0.00659125
HMDB0000824	Propionylcarnitine	1.57679	0.739278	0.00054901	0.00286052
HMDB0000767	Pseudouridine	1.68408	0.793775	0.00010144	0.000890887
HMDB0001895	Salicylic acid	1.77223	0.707067	3.46e-05	0.000415132
HMDB0000792	Sebacic acid	1.27396	1.32457	0.0220593	0.0400397
HMDB0012090	SM(d18:0/20:0)	1.53723	1.19961	0.000845261	0.00392523
HMDB0001383	Sphinganine 1-phosphate	1.13898	0.843935	0.0113408	0.0251632
HMDB0062531	Sphingosine 1-phosphate	1.18362	0.888106	0.0182256	0.0353891
HMDB0002639	Sulfolithocholylglycine	1.90253	0.231323	0.000876055	0.00403254
HMDB0000251	Taurine	1.33123	0.855631	0.00464451	0.0130169
HMDB0000872	Tetradecanedioic acid	1.14721	0.662428	0.00762167	0.018821
HMDB0005972	Tetrahydrodeoxycortisol	1.77964	0.564941	5.16e-05	0.000560892
HMDB0000943	Threonic acid	1.18482	0.825582	0.0244726	0.0429499
HMDB0000289	Uric acid	1.61764	0.806741	0.000197383	0.00138787
HMDB0000292	Xanthine	1.25053	0.77924	0.00473344	0.0132121

## Sheet: Table S2
Table S2. Differential metabolites between colitis mice induced by DSS and control
HMDB	Metabolites	VIP	FoldChange	p.t	p.BH
HMDB0000012	Deoxyuridine	1.21981	2.84261	0.00355415	0.00772582
HMDB0000070	Pipecolic acid	1.30013	0.623959	0.00146304	0.00422916
HMDB0000089	Cytidine	1.51839	1.43815	0.00221095	0.00565803
HMDB0000094	Citric acid	1.65655	0.26841	0.000112496	0.000702563
HMDB0000126	Glycerol 3-phosphate	1.30841	0.674154	0.0489658	0.0490529
HMDB0000143	D-Galactose	1.72089	0.583834	0.00082086	0.00291574
HMDB0000167	L-Threonine	1.95336	1.21922	0.0462867	0.0468125
HMDB0000182	L-Lysine	1.52644	1.37673	0.00562622	0.0102344
HMDB0000251	Taurine	1.00084	0.743179	0.0338038	0.0368115
HMDB0000259	Serotonin	1.18947	0.555334	0.0382346	0.0406752
HMDB0000277	Sphingosine 1-phosphate	1.91892	0.436083	8.07035e-07	9.00283e-05
HMDB0000289	Uric acid	1.15847	0.660637	0.0260914	0.0308602
HMDB0000296	Uridine	1.15527	4.02359	0.0464752	0.0468917
HMDB0000350	3-Hydroxysebacic acid	1.5719	0.231101	0.00263437	0.00626052
HMDB0000472	5-Hydroxy-L-tryptophan	1.22603	0.538607	0.00459917	0.00910134
HMDB0000496	3-Methoxy-4-hydroxyphenylglycol glucuronide	1.4917	0.500869	0.0377776	0.0402818
HMDB0000497	5,6-Dihydrouridine	1.34749	0.430187	0.00615003	0.0108202
HMDB0000517	L-Arginine	2.12748	1.52622	0.00107237	0.00343037
HMDB0000565	Galactonic acid	1.67629	0.40485	0.000599701	0.00234466
HMDB0000673	Linoleic acid	1.46521	4.06166	0.00440534	0.0088421
HMDB0000682	Indoxyl sulfate	1.2972	0.141056	0.00761764	0.0126511
HMDB0000684	L-Kynurenine	1.70275	0.67892	0.0164823	0.0216307
HMDB0000714	Hippuric acid	1.51707	0.135552	0.000705561	0.00262199
HMDB0000784	Azelaic acid	1.29047	0.670249	0.0287771	0.0328631
HMDB0000824	Propionylcarnitine	1.27822	0.643238	0.042642	0.0441313
HMDB0000867	Ribonic acid	1.57376	0.359701	4.5487e-06	0.000117744
HMDB0000872	Tetradecanedioic acid	1.51824	0.397654	0.000753234	0.00273594
HMDB0000929	L-Tryptophan	1.60219	0.539228	2.85891e-05	0.000282429
HMDB0000998	dCTP	1.39294	0.73019	0.0403634	0.0423176
HMDB0001015	N-Formyl-L-methionine	1.4346	0.324298	0.0123572	0.0176917
HMDB0001139	Prostaglandin F2a	1.76998	0.490726	0.00541436	0.010077
HMDB0001274	dTDP	2.13353	0.796812	0.0158621	0.0209633
HMDB0001337	Leukotriene A4	1.29934	3.72596	0.0323177	0.0357463
HMDB0001392	p-Aminobenzoic acid	1.88188	0.51691	0.00661273	0.0114027
HMDB0001396	5-Methyltetrahydrofolic acid	1.87826	0.440822	0.000329891	0.00148146
HMDB0001401	Glucose 6-phosphate	1.9676	0.553949	2.01285e-05	0.000228937
HMDB0001406	Niacinamide	1.16328	0.748666	0.00821832	0.0132767
HMDB0002013	Butyrylcarnitine	1.68362	0.357777	5.77316e-05	0.000467667
HMDB0002117	Oleamide	1.16288	1.5834	0.0408198	0.0425979
HMDB0002369	9-cis-Retinoic acid	1.38269	3.75673	0.0123654	0.0176917
HMDB0002815	LysoPC(18:1(9Z))	1.85569	0.601435	0.000459276	0.00190828
HMDB0004243	12(S)-HPETE	1.24179	0.514485	0.00254991	0.00610893
HMDB0004667	13-HODE	1.1225	6.6307	0.0407891	0.0425979
HMDB0006294	16-Hydroxy hexadecanoic acid	1.90837	0.302728	0.000330237	0.00148146
HMDB0006510	Cervonyl carnitine	1.6028	3.43826	0.00373122	0.00794074
HMDB0006790	Galactosylglycerol	1.39405	0.48146	0.0033809	0.0074499
HMDB0010325	Ethyl glucuronide	1.43109	0.310345	0.00350341	0.00765641
HMDB0010379	LysoPC(14:0/0:0)	1.92974	0.243149	0.000389283	0.00167944
HMDB0010381	LysoPC(15:0)	1.4522	0.596255	0.00236442	0.00582441
HMDB0010382	LysoPC(16:0)	1.92404	0.751152	8.57293e-05	0.000588605
HMDB0010383	LysoPC(16:1(9Z)/0:0)	2.13759	0.219575	3.7162e-06	0.000117744
HMDB0010393	LysoPC(20:3(5Z,8Z,11Z))	1.89221	0.44633	0.000207857	0.00107361
HMDB0010404	LysoPC(22:6(4Z,7Z,10Z,13Z,16Z,19Z))	1.49261	1.66499	0.00794212	0.0130552
HMDB0010407	LysoPC(P-16:0)	1.26754	0.750857	0.019314	0.0246291
HMDB0010408	LysoPC(P-18:1(9Z))	1.95742	0.501473	3.1447e-05	0.00028788
HMDB0011112	N1-(alpha-D-ribosyl)-5,6-dimethyl-benzimidazole	1.5678	0.300034	0.000150323	0.000854869
HMDB0011512	LysoPE(20:1(11Z)/0:0)	2.11346	0.322539	1.67185e-06	9.28888e-05
HMDB0011521	LysoPE(22:1(13Z)/0:0)	1.97896	0.470721	9.59792e-07	9.00604e-05
HMDB0011723	2-Methylhippuric acid	1.27015	0.342617	0.00730902	0.012247
HMDB0011741	gamma-Glutamyltyrosine	1.65362	0.592979	0.00357892	0.00774856
HMDB0011745	N-Acetyl-L-methionine	1.38876	0.467519	0.0004894	0.00201855
HMDB0012108	LysoPC(17:0)	1.24505	0.671388	0.017338	0.0224139
HMDB0012175	5-Acetamidovalerate	1.16054	0.699441	0.0136762	0.0189639
HMDB0012458	7alpha-Hydroxy-3-oxo-4-cholestenoate	1.4314	0.349064	0.00019199	0.00101972
HMDB0013122	LysoPC(P-18:0)	1.98889	0.483227	6.76725e-06	0.00014111
HMDB0028742	Asparaginyl-Tryptophan	1.58019	0.19938	0.00595031	0.010635
HMDB0028744	Asparaginyl-Valine	2.09353	0.111858	0.000211496	0.00108248
HMDB0028825	Glutamylmethionine	1.41692	0.594623	0.0172374	0.0223609
HMDB0028881	Histidinyl-Aspartate	1.50623	0.422532	0.000888865	0.00307013
HMDB0059921	Trimetaphosphoric acid	1.35245	1.92326	0.0147914	0.0199463

## Sheet: Table S3
Table S3. Enriched pathways in colitis mice induced by DSS in comparison with control
Pathway id	Description	Database	Ratio_in_study	Ratio_in_pop	Pvalue	Padjust	First Category	Second Category
map04060	Cytokine-cytokine receptor interaction	KEGG PATHWAY	25/227	362/27719	4.11771e-16	8.48249e-14	Environmental Information Processing	Signaling molecules and interaction
map04514	Cell adhesion molecules (CAMs)	KEGG PATHWAY	22/227	351/27719	1.87973e-13	1.93612e-11	Environmental Information Processing	Signaling molecules and interaction
map05321	Inflammatory bowel disease (IBD)	KEGG PATHWAY	16/227	192/27719	5.77743e-12	3.96717e-10	Human Diseases	Immune disease
map04062	Chemokine signaling pathway	KEGG PATHWAY	18/227	271/27719	1.22264e-11	6.29658e-10	Organismal Systems	Immune system
map04061	Viral protein interaction with cytokine and cytokine receptor	KEGG PATHWAY	13/227	118/27719	1.72046e-11	7.08829e-10	Environmental Information Processing	Signaling molecules and interaction
map05332	Graft-versus-host disease	KEGG PATHWAY	15/227	217/27719	3.78964e-10	1.30111e-08	Human Diseases	Immune disease
map04940	Type I diabetes mellitus	KEGG PATHWAY	16/227	261/27719	5.68293e-10	1.6724e-08	Human Diseases	Endocrine and metabolic disease
map04640	Hematopoietic cell lineage	KEGG PATHWAY	17/227	318/27719	1.32154e-09	3.40297e-08	Organismal Systems	Immune system
map04659	Th17 cell differentiation	KEGG PATHWAY	16/227	288/27719	2.36357e-09	5.40994e-08	Organismal Systems	Immune system
map05320	Autoimmune thyroid disease	KEGG PATHWAY	19/227	442/27719	5.08506e-09	1.04752e-07	Human Diseases	Immune disease
map04662	B cell receptor signaling pathway	KEGG PATHWAY	16/227	321/27719	1.10498e-08	2.06932e-07	Organismal Systems	Immune system
map05169	Epstein-Barr virus infection	KEGG PATHWAY	26/227	862/27719	1.2119e-08	2.08042e-07	Human Diseases	Infectious disease: viral
map05140	Leishmaniasis	KEGG PATHWAY	16/227	329/27719	1.56116e-08	2.29714e-07	Human Diseases	Infectious disease: parasitic
map05330	Allograft rejection	KEGG PATHWAY	18/227	423/27719	1.52754e-08	2.42056e-07	Human Diseases	Immune disease
map05323	Rheumatoid arthritis	KEGG PATHWAY	18/227	460/27719	5.45375e-08	7.48981e-07	Human Diseases	Immune disease
map04672	Intestinal immune network for IgA production	KEGG PATHWAY	16/227	369/27719	7.64262e-08	9.83987e-07	Organismal Systems	Immune system
map04064	NF-kappa B signaling pathway	KEGG PATHWAY	18/227	473/27719	8.27823e-08	1.00313e-06	Environmental Information Processing	Signal transduction
map05166	Human T-cell leukemia virus 1 infection	KEGG PATHWAY	19/227	539/27719	1.17778e-07	1.3479e-06	Human Diseases	Infectious disease: viral
map05416	Viral myocarditis	KEGG PATHWAY	19/227	555/27719	1.84687e-07	1.90227e-06	Human Diseases	Cardiovascular disease
map04612	Antigen processing and presentation	KEGG PATHWAY	15/227	344/27719	1.8335e-07	1.9879e-06	Organismal Systems	Immune system
map04658	Th1 and Th2 cell differentiation	KEGG PATHWAY	12/227	230/27719	4.84792e-07	4.75558e-06	Organismal Systems	Immune system
map05145	Toxoplasmosis	KEGG PATHWAY	11/227	199/27719	8.30472e-07	7.77624e-06	Human Diseases	Infectious disease: parasitic
map05152	Tuberculosis	KEGG PATHWAY	16/227	498/27719	3.98362e-06	3.56794e-05	Human Diseases	Infectious disease: bacterial
map05310	Asthma	KEGG PATHWAY	13/227	354/27719	7.99397e-06	6.86149e-05	Human Diseases	Immune disease
map05340	Primary immunodeficiency	KEGG PATHWAY	12/227	325/27719	1.69666e-05	0.000139805	Human Diseases	Immune disease
map04630	Jak-STAT signaling pathway	KEGG PATHWAY	10/227	233/27719	2.42734e-05	0.00019232	Environmental Information Processing	Signal transduction
map04666	Fc gamma R-mediated phagocytosis	KEGG PATHWAY	12/227	372/27719	6.29596e-05	0.000480358	Organismal Systems	Immune system
map04145	Phagosome	KEGG PATHWAY	16/227	630/27719	6.97479e-05	0.000513145	Cellular Processes	Transport and catabolism
map05162	Measles	KEGG PATHWAY	12/227	399/27719	0.000121857	0.000865602	Human Diseases	Infectious disease: viral
map05168	Herpes simplex virus 1 infection	KEGG PATHWAY	19/227	885/27719	0.000136155	0.000934928	Human Diseases	Infectious disease: viral
map05235	PD-L1 expression and PD-1 checkpoint pathway in cancer	KEGG PATHWAY	9/227	239/27719	0.000167369	0.0011122	Human Diseases	Cancer: overview
map04670	Leukocyte transendothelial migration	KEGG PATHWAY	9/227	243/27719	0.000189433	0.00121947	Organismal Systems	Immune system
map05163	Human cytomegalovirus infection	KEGG PATHWAY	12/227	429/27719	0.000237614	0.00143966	Human Diseases	Infectious disease: viral
map04710	Circadian rhythm	KEGG PATHWAY	4/227	37/27719	0.000233992	0.00146068	Organismal Systems	Environmental adaptation
map05170	Human immunodeficiency virus 1 infection	KEGG PATHWAY	14/227	567/27719	0.000263962	0.0015536	Human Diseases	Infectious disease: viral
map05164	Influenza A	KEGG PATHWAY	12/227	441/27719	0.000305044	0.00169835	Human Diseases	Infectious disease: viral
map05150	Staphylococcus aureus infection	KEGG PATHWAY	13/227	506/27719	0.000299439	0.00171345	Human Diseases	Infectious disease: bacterial
map04660	T cell receptor signaling pathway	KEGG PATHWAY	9/227	276/27719	0.000481419	0.00254288	Organismal Systems	Immune system
map05202	Transcriptional misregulation in cancer	KEGG PATHWAY	15/227	674/27719	0.000479032	0.00259686	Human Diseases	Cancer: overview
map04620	Toll-like receptor signaling pathway	KEGG PATHWAY	6/227	127/27719	0.000640342	0.00329776	Organismal Systems	Immune system
map05144	Malaria	KEGG PATHWAY	7/227	187/27719	0.000918388	0.00461434	Human Diseases	Infectious disease: parasitic
map04960	Aldosterone-regulated sodium reabsorption	KEGG PATHWAY	4/227	55/27719	0.00107702	0.00528255	Organismal Systems	Excretory system
map04014	Ras signaling pathway	KEGG PATHWAY	11/227	450/27719	0.00129111	0.00618531	Environmental Information Processing	Signal transduction
map04621	NOD-like receptor signaling pathway	KEGG PATHWAY	10/227	384/27719	0.00133495	0.00624999	Organismal Systems	Immune system
map05142	Chagas disease (American trypanosomiasis)	KEGG PATHWAY	8/227	261/27719	0.00146123	0.00668917	Human Diseases	Infectious disease: parasitic
map04668	TNF signaling pathway	KEGG PATHWAY	6/227	150/27719	0.00151653	0.00679142	Environmental Information Processing	Signal transduction
map00380	Tryptophan metabolism	KEGG PATHWAY	4/227	62/27719	0.0016848	0.00738446	Metabolism	Amino acid metabolism
map05322	Systemic lupus erythematosus	KEGG PATHWAY	13/227	622/27719	0.00197184	0.00846246	Human Diseases	Immune disease
map04380	Osteoclast differentiation	KEGG PATHWAY	6/227	167/27719	0.00260305	0.0109434	Organismal Systems	Development and regeneration
map05146	Amoebiasis	KEGG PATHWAY	9/227	373/27719	0.00380725	0.0156859	Human Diseases	Infectious disease: parasitic
map05143	African trypanosomiasis	KEGG PATHWAY	7/227	247/27719	0.00439692	0.0177601	Human Diseases	Infectious disease: parasitic
map04657	IL-17 signaling pathway	KEGG PATHWAY	6/227	188/27719	0.00464974	0.0184201	Organismal Systems	Immune system
map05167	Kaposi sarcoma-associated herpesvirus infection	KEGG PATHWAY	9/227	387/27719	0.00482953	0.0187714	Human Diseases	Infectious disease: viral
map04370	VEGF signaling pathway	KEGG PATHWAY	4/227	85/27719	0.00528501	0.0201613	Environmental Information Processing	Signal transduction
map04929	GnRH secretion	KEGG PATHWAY	4/227	88/27719	0.00597227	0.0223689	Organismal Systems	Endocrine system
map00430	Taurine and hypotaurine metabolism	KEGG PATHWAY	2/227	15/27719	0.00653533	0.0240407	Metabolism	Metabolism of other amino acids
map04010	MAPK signaling pathway	KEGG PATHWAY	9/227	417/27719	0.00773177	0.0279429	Environmental Information Processing	Signal transduction
map04015	Rap1 signaling pathway	KEGG PATHWAY	10/227	501/27719	0.00864161	0.0306926	Environmental Information Processing	Signal transduction
map04020	Calcium signaling pathway	KEGG PATHWAY	11/227	588/27719	0.0095314	0.0332791	Environmental Information Processing	Signal transduction
map04625	C-type lectin receptor signaling pathway	KEGG PATHWAY	5/227	159/27719	0.010127	0.0347692	Organismal Systems	Immune system
map05221	Acute myeloid leukemia	KEGG PATHWAY	4/227	104/27719	0.0106465	0.0359538	Human Diseases	Cancer: specific types
map04664	Fc epsilon RI signaling pathway	KEGG PATHWAY	7/227	294/27719	0.0109704	0.0364499	Organismal Systems	Immune system
map05135	Yersinia infection	KEGG PATHWAY	8/227	380/27719	0.0134619	0.0440182	Human Diseases	Infectious disease: bacterial

## Sheet: Table S4
Table S4. Enriched pathways in colitis mice upon pasteurised Akk treatment
Pathway id	Description	Database	Ratio_in_study	Ratio_in_pop	Pvalue	Padjust	First Category	Second Category
map04512	ECM-receptor interaction	KEGG PATHWAY	9/85	108/27719	4.74215e-11	7.0658e-09	Environmental Information Processing	Signaling molecules and interaction
map04151	PI3K-Akt signaling pathway	KEGG PATHWAY	17/85	1011/27719	9.68202e-09	7.21311e-07	Environmental Information Processing	Signal transduction
map05146	Amoebiasis	KEGG PATHWAY	10/85	373/27719	2.20497e-07	1.09513e-05	Human Diseases	Infectious disease: parasitic
map05414	Dilated cardiomyopathy (DCM)	KEGG PATHWAY	10/85	403/27719	4.47816e-07	1.66812e-05	Human Diseases	Cardiovascular disease
map04510	Focal adhesion	KEGG PATHWAY	9/85	358/27719	1.57069e-06	4.68065e-05	Cellular Processes	Cellular community - eukaryotes
map05165	Human papillomavirus infection	KEGG PATHWAY	10/85	588/27719	1.28341e-05	0.000273183	Human Diseases	Infectious disease: viral
map04064	NF-kappa B signaling pathway	KEGG PATHWAY	9/85	473/27719	1.48581e-05	0.000276732	Environmental Information Processing	Signal transduction
map05143	African trypanosomiasis	KEGG PATHWAY	7/85	247/27719	1.11977e-05	0.000278076	Human Diseases	Infectious disease: parasitic
map04672	Intestinal immune network for IgA production	KEGG PATHWAY	8/85	369/27719	1.80273e-05	0.000298452	Organismal Systems	Immune system
map04664	Fc epsilon RI signaling pathway	KEGG PATHWAY	7/85	294/27719	3.42359e-05	0.000425095	Organismal Systems	Immune system
map04974	Protein digestion and absorption	KEGG PATHWAY	5/85	119/27719	3.34165e-05	0.000452641	Organismal Systems	Digestive system
map04072	Phospholipase D signaling pathway	KEGG PATHWAY	8/85	400/27719	3.20268e-05	0.000477199	Environmental Information Processing	Signal transduction
map04662	B cell receptor signaling pathway	KEGG PATHWAY	7/85	321/27719	5.96223e-05	0.000634552	Organismal Systems	Immune system
map05340	Primary immunodeficiency	KEGG PATHWAY	7/85	325/27719	6.4438e-05	0.000640084	Human Diseases	Immune disease
map04640	Hematopoietic cell lineage	KEGG PATHWAY	7/85	318/27719	5.62074e-05	0.000644223	Organismal Systems	Immune system
map05140	Leishmaniasis	KEGG PATHWAY	7/85	329/27719	6.95676e-05	0.000647848	Human Diseases	Infectious disease: parasitic
map04020	Calcium signaling pathway	KEGG PATHWAY	9/85	588/27719	8.04312e-05	0.000704956	Environmental Information Processing	Signal transduction
map05323	Rheumatoid arthritis	KEGG PATHWAY	8/85	460/27719	8.52559e-05	0.00070573	Human Diseases	Immune disease
map04650	Natural killer cell mediated cytotoxicity	KEGG PATHWAY	7/85	347/27719	9.69598e-05	0.000760369	Organismal Systems	Immune system
map05310	Asthma	KEGG PATHWAY	7/85	354/27719	0.00010974	0.000817566	Human Diseases	Immune disease
map04145	Phagosome	KEGG PATHWAY	9/85	630/27719	0.000135425	0.00096087	Cellular Processes	Transport and catabolism
map04666	Fc gamma R-mediated phagocytosis	KEGG PATHWAY	7/85	372/27719	0.000149007	0.000965305	Organismal Systems	Immune system
map05152	Tuberculosis	KEGG PATHWAY	8/85	498/27719	0.000147154	0.000996633	Human Diseases	Infectious disease: bacterial
map05150	Staphylococcus aureus infection	KEGG PATHWAY	8/85	506/27719	0.00016404	0.00101842	Human Diseases	Infectious disease: bacterial
map05416	Viral myocarditis	KEGG PATHWAY	8/85	555/27719	0.000305977	0.00182362	Human Diseases	Cardiovascular disease
map05330	Allograft rejection	KEGG PATHWAY	7/85	423/27719	0.000325393	0.00186475	Human Diseases	Immune disease
map05320	Autoimmune thyroid disease	KEGG PATHWAY	7/85	442/27719	0.000423326	0.00233613	Human Diseases	Immune disease
map05200	Pathways in cancer	KEGG PATHWAY	10/85	924/27719	0.000526843	0.00280356	Human Diseases	Cancer: overview
map05322	Systemic lupus erythematosus	KEGG PATHWAY	8/85	622/27719	0.000648994	0.00333449	Human Diseases	Immune disease
map05202	Transcriptional misregulation in cancer	KEGG PATHWAY	8/85	674/27719	0.00108898	0.00540858	Human Diseases	Cancer: overview
map05222	Small cell lung cancer	KEGG PATHWAY	4/85	193/27719	0.00297279	0.0142886	Human Diseases	Cancer: specific types
map04976	Bile secretion	KEGG PATHWAY	3/85	103/27719	0.00394648	0.0183758	Organismal Systems	Digestive system
map05130	Pathogenic Escherichia coli infection	KEGG PATHWAY	9/85	1099/27719	0.00650386	0.0276879	Human Diseases	Infectious disease: bacterial
map04310	Wnt signaling pathway	KEGG PATHWAY	4/85	237/27719	0.00614374	0.0277399	Environmental Information Processing	Signal transduction
map05205	Proteoglycans in cancer	KEGG PATHWAY	6/85	542/27719	0.00646703	0.0283408	Human Diseases	Cancer: overview
map04350	TGF-beta signaling pathway	KEGG PATHWAY	3/85	139/27719	0.00903326	0.0373877	Environmental Information Processing	Signal transduction

## Sheet: Table S5
Table S5. Enriched pathways in colitis mice upon Amuc_1100 treatment
Pathway id	Description	Database	Ratio_in_study	Ratio_in_pop	Pvalue	Padjust	First Category	Second Category
map05143	African trypanosomiasis	KEGG PATHWAY	8/19	247/27719	2.46446e-12	4.68247e-11	Human Diseases	Infectious disease: parasitic
map05414	Dilated cardiomyopathy (DCM)	KEGG PATHWAY	9/19	403/27719	2.15724e-12	8.19753e-11	Human Diseases	Cardiovascular disease
map04664	Fc epsilon RI signaling pathway	KEGG PATHWAY	8/19	294/27719	9.94689e-12	1.25994e-10	Organismal Systems	Immune system
map05140	Leishmaniasis	KEGG PATHWAY	8/19	329/27719	2.44083e-11	1.32502e-10	Human Diseases	Infectious disease: parasitic
map05340	Primary immunodeficiency	KEGG PATHWAY	8/19	325/27719	2.21408e-11	1.40225e-10	Human Diseases	Immune disease
map04662	B cell receptor signaling pathway	KEGG PATHWAY	8/19	321/27719	2.00591e-11	1.5245e-10	Organismal Systems	Immune system
map04640	Hematopoietic cell lineage	KEGG PATHWAY	8/19	318/27719	1.86119e-11	1.76813e-10	Organismal Systems	Immune system
map04650	Natural killer cell mediated cytotoxicity	KEGG PATHWAY	8/19	347/27719	3.73051e-11	1.77199e-10	Organismal Systems	Immune system
map05310	Asthma	KEGG PATHWAY	8/19	354/27719	4.37299e-11	1.84637e-10	Human Diseases	Immune disease
map05146	Amoebiasis	KEGG PATHWAY	8/19	373/27719	6.62607e-11	2.09825e-10	Human Diseases	Infectious disease: parasitic
map04666	Fc gamma R-mediated phagocytosis	KEGG PATHWAY	8/19	372/27719	6.48626e-11	2.24071e-10	Organismal Systems	Immune system
map04672	Intestinal immune network for IgA production	KEGG PATHWAY	8/19	369/27719	6.08215e-11	2.31122e-10	Organismal Systems	Immune system
map04072	Phospholipase D signaling pathway	KEGG PATHWAY	8/19	400/27719	1.15375e-10	3.3725e-10	Environmental Information Processing	Signal transduction
map05330	Allograft rejection	KEGG PATHWAY	8/19	423/27719	1.79665e-10	4.87662e-10	Human Diseases	Immune disease
map05320	Autoimmune thyroid disease	KEGG PATHWAY	8/19	442/27719	2.54344e-10	6.44338e-10	Human Diseases	Immune disease
map05323	Rheumatoid arthritis	KEGG PATHWAY	8/19	460/27719	3.48659e-10	8.28066e-10	Human Diseases	Immune disease
map04064	NF-kappa B signaling pathway	KEGG PATHWAY	8/19	473/27719	4.34454e-10	9.71133e-10	Environmental Information Processing	Signal transduction
map05152	Tuberculosis	KEGG PATHWAY	8/19	498/27719	6.52094e-10	1.37664e-09	Human Diseases	Infectious disease: bacterial
map05150	Staphylococcus aureus infection	KEGG PATHWAY	8/19	506/27719	7.39309e-10	1.47862e-09	Human Diseases	Infectious disease: bacterial
map05416	Viral myocarditis	KEGG PATHWAY	8/19	555/27719	1.52928e-09	2.90563e-09	Human Diseases	Cardiovascular disease
map04020	Calcium signaling pathway	KEGG PATHWAY	8/19	588/27719	2.40582e-09	4.35339e-09	Environmental Information Processing	Signal transduction
map05322	Systemic lupus erythematosus	KEGG PATHWAY	8/19	622/27719	3.73601e-09	6.45311e-09	Human Diseases	Immune disease
map04145	Phagosome	KEGG PATHWAY	8/19	630/27719	4.12869e-09	6.82131e-09	Cellular Processes	Transport and catabolism
map05202	Transcriptional misregulation in cancer	KEGG PATHWAY	8/19	674/27719	6.99471e-09	1.1075e-08	Human Diseases	Cancer: overview
map05169	Epstein-Barr virus infection	KEGG PATHWAY	8/19	862/27719	4.72142e-08	7.17655e-08	Human Diseases	Infectious disease: viral
map04151	PI3K-Akt signaling pathway	KEGG PATHWAY	8/19	1011/27719	1.60943e-07	2.35224e-07	Environmental Information Processing	Signal transduction
map05130	Pathogenic Escherichia coli infection	KEGG PATHWAY	8/19	1099/27719	3.04593e-07	4.28686e-07	Human Diseases	Infectious disease: bacterial
map04080	Neuroactive ligand-receptor interaction	KEGG PATHWAY	3/19	430/27719	0.00298616	0.00405265	Environmental Information Processing	Signaling molecules and interaction

## Sheet: Table S6
Table S6. Enriched GO terms in colitis mice induced by DSS in comparison with control
Number	GO ID	Term Type	Description	Ratio_in_study	Ratio_in_pop	Pvalue	Padjust
7	GO:0019724	BP	B cell mediated immunity	7/293	47/38701	6.44097e-08	0.000115854
8	GO:0090022	BP	regulation of neutrophil chemotaxis	8/293	74/38701	9.591e-08	0.000115854
8	GO:1902624	BP	positive regulation of neutrophil migration	8/293	75/38701	1.06662e-07	0.000115854
8	GO:0002260	BP	lymphocyte homeostasis	8/293	75/38701	1.06662e-07	0.000115854
9	GO:0030593	BP	neutrophil chemotaxis	9/293	105/38701	1.15068e-07	0.000115854
10	GO:0002889	BP	regulation of immunoglobulin mediated immune response	10/293	77/38701	1.31303e-07	0.000115854
10	GO:0002712	BP	regulation of B cell mediated immunity	10/293	77/38701	1.31303e-07	0.000115854
12	GO:0002690	BP	positive regulation of leukocyte chemotaxis	12/293	178/38701	1.31856e-07	0.000115854
13	GO:0002443	BP	leukocyte mediated immunity	13/293	141/38701	1.36905e-07	0.000115854
9	GO:0002920	BP	regulation of humoral immune response	9/293	78/38701	1.45355e-07	0.000115854
10	GO:0070664	BP	negative regulation of leukocyte proliferation	10/293	108/38701	1.46838e-07	0.000115854
15	GO:0051250	BP	negative regulation of lymphocyte activation	15/293	222/38701	1.52601e-07	0.000115854
14	GO:0045582	BP	positive regulation of T cell differentiation	14/293	143/38701	1.56262e-07	0.000115854
17	GO:0045580	BP	regulation of T cell differentiation	17/293	224/38701	1.68142e-07	0.000115854
9	GO:2000107	BP	negative regulation of leukocyte apoptotic process	9/293	110/38701	1.72031e-07	0.000115854
9	GO:0050869	BP	negative regulation of B cell activation	9/293	54/38701	1.7335e-07	0.000115854
16	GO:0030595	BP	leukocyte chemotaxis	16/293	184/38701	1.84349e-07	0.000115854
9	GO:0071621	BP	granulocyte chemotaxis	9/293	111/38701	1.85979e-07	0.000115854
21	GO:0050870	BP	positive regulation of T cell activation	21/293	321/38701	1.98883e-07	0.000115854
7	GO:0002922	BP	positive regulation of humoral immune response	7/293	34/38701	2.01336e-07	0.000115854
7	GO:0016064	BP	immunoglobulin mediated immune response	7/293	34/38701	2.01336e-07	0.000115854
12	GO:0030183	BP	B cell differentiation	12/293	147/38701	2.02312e-07	0.000115854
9	GO:0002711	BP	positive regulation of T cell mediated immunity	9/293	113/38701	2.16851e-07	0.000115854
17	GO:0050871	BP	positive regulation of B cell activation	17/293	276/38701	2.27272e-07	0.000115854
16	GO:0001818	BP	negative regulation of cytokine production	16/293	377/38701	2.36824e-07	0.000115854
24	GO:0002822	BP	regulation of adaptive immune response based on somatic recombination of immune receptors built from immunoglobulin superfamily domains	24/293	277/38701	2.36867e-07	0.000115854
7	GO:0002312	BP	B cell activation involved in immune response	7/293	57/38701	2.53819e-07	0.000115854
11	GO:0050854	BP	regulation of antigen receptor-mediated signaling pathway	11/293	84/38701	2.59863e-07	0.000115854
25	GO:0002429	BP	immune response-activating cell surface receptor signaling pathway	25/293	436/38701	2.77883e-07	0.000115854
23	GO:0045619	BP	regulation of lymphocyte differentiation	23/293	282/38701	2.90508e-07	0.000115854
9	GO:0071622	BP	regulation of granulocyte chemotaxis	9/293	117/38701	2.9218e-07	0.000115854
13	GO:0048872	BP	homeostasis of number of cells	13/293	237/38701	3.08414e-07	0.000115854
15	GO:0042102	BP	positive regulation of T cell proliferation	15/293	154/38701	3.12023e-07	0.000115854
9	GO:1990266	BP	neutrophil migration	9/293	118/38701	3.14226e-07	0.000115854
19	GO:0050900	BP	leukocyte migration	19/293	284/38701	3.14845e-07	0.000115854
20	GO:0050866	BP	negative regulation of cell activation	20/293	284/38701	3.14845e-07	0.000115854
14	GO:0050921	BP	positive regulation of chemotaxis	14/293	238/38701	3.22622e-07	0.000115854
7	GO:0002891	BP	positive regulation of immunoglobulin mediated immune response	7/293	59/38701	3.23309e-07	0.000115854
7	GO:0002714	BP	positive regulation of B cell mediated immunity	7/293	59/38701	3.23309e-07	0.000115854
11	GO:0002709	BP	regulation of T cell mediated immunity	11/293	155/38701	3.31336e-07	0.000115854
22	GO:0042129	BP	regulation of T cell proliferation	22/293	239/38701	3.3741e-07	0.000115854
12	GO:0002460	BP	adaptive immune response based on somatic recombination of immune receptors built from immunoglobulin superfamily domains	12/293	119/38701	3.37701e-07	0.000115854
12	GO:0002449	BP	lymphocyte mediated immunity	12/293	119/38701	3.37701e-07	0.000115854
5	GO:0030889	BP	negative regulation of B cell proliferation	5/293	20/38701	3.39547e-07	0.000115854
11	GO:0002637	BP	regulation of immunoglobulin production	11/293	87/38701	3.41548e-07	0.000115854
21	GO:0060326	BP	cell chemotaxis	21/293	443/38701	3.43515e-07	0.000115854
21	GO:1903708	BP	positive regulation of hemopoiesis	21/293	336/38701	3.45205e-07	0.000115854
21	GO:0007204	BP	positive regulation of cytosolic calcium ion concentration	21/293	389/38701	3.52563e-07	0.000115854
21	GO:0002706	BP	regulation of lymphocyte mediated immunity	21/293	288/38701	3.69064e-07	0.000115854
36	GO:0070663	BP	regulation of leukocyte proliferation	36/293	338/38701	3.70706e-07	0.000115854
9	GO:0032655	BP	regulation of interleukin-12 production	9/293	88/38701	3.73255e-07	0.000115854
23	GO:0051480	BP	regulation of cytosolic calcium ion concentration	23/293	446/38701	3.75715e-07	0.000115854
17	GO:0042110	BP	T cell activation	17/293	391/38701	3.76186e-07	0.000115854
29	GO:1903706	BP	regulation of hemopoiesis	29/293	688/38701	3.8061e-07	0.000115854
37	GO:0002696	BP	positive regulation of leukocyte activation	37/293	688/38701	3.8061e-07	0.000115854
22	GO:0022409	BP	positive regulation of cell-cell adhesion	22/293	393/38701	4.01228e-07	0.000115854
27	GO:0042113	BP	B cell activation	27/293	243/38701	4.0278e-07	0.000115854
17	GO:0030888	BP	regulation of B cell proliferation	17/293	89/38701	4.07449e-07	0.000115854
9	GO:0030890	BP	positive regulation of B cell proliferation	9/293	61/38701	4.08149e-07	0.000115854
35	GO:0030155	BP	regulation of cell adhesion	35/293	1034/38701	4.17992e-07	0.000115854
63	GO:0050865	BP	regulation of cell activation	63/293	1035/38701	4.25451e-07	0.000115854
21	GO:1903039	BP	positive regulation of leukocyte cell-cell adhesion	21/293	342/38701	4.2685e-07	0.000115854
17	GO:0050920	BP	regulation of chemotaxis	17/293	342/38701	4.2685e-07	0.000115854
6	GO:0033089	BP	positive regulation of T cell differentiation in thymus	6/293	21/38701	4.42898e-07	0.000115854
9	GO:1902622	BP	regulation of neutrophil migration	9/293	90/38701	4.44287e-07	0.000115854
10	GO:0070098	BP	chemokine-mediated signaling pathway	10/293	90/38701	4.44287e-07	0.000115854
17	GO:0002708	BP	positive regulation of lymphocyte mediated immunity	17/293	201/38701	4.46636e-07	0.000115854
36	GO:0002697	BP	regulation of immune effector process	36/293	696/38701	4.55812e-07	0.000115854
31	GO:0055080	BP	cation homeostasis	31/293	968/38701	4.60835e-07	0.000115854
55	GO:0051249	BP	regulation of lymphocyte activation	55/293	830/38701	4.6869e-07	0.000115854
16	GO:0045621	BP	positive regulation of lymphocyte differentiation	16/293	161/38701	4.70778e-07	0.000115854
6	GO:0033081	BP	regulation of T cell differentiation in thymus	6/293	39/38701	4.73146e-07	0.000115854
24	GO:0050851	BP	antigen receptor-mediated signaling pathway	24/293	345/38701	4.7385e-07	0.000115854
32	GO:0002764	BP	immune response-regulating signaling pathway	32/293	572/38701	4.75426e-07	0.000115854
19	GO:1902107	BP	positive regulation of leukocyte differentiation	19/293	247/38701	4.79181e-07	0.000115854
9	GO:0042035	BP	regulation of cytokine biosynthetic process	9/293	124/38701	4.79346e-07	0.000115854
12	GO:0032729	BP	positive regulation of interferon-gamma production	12/293	124/38701	4.79346e-07	0.000115854
33	GO:0002250	BP	adaptive immune response	33/293	399/38701	4.85644e-07	0.000115854
32	GO:0001819	BP	positive regulation of cytokine production	32/293	1190/38701	4.87864e-07	0.000115854
21	GO:0002824	BP	positive regulation of adaptive immune response based on somatic recombination of immune receptors built from immunoglobulin superfamily domains	21/293	203/38701	4.92805e-07	0.000115854
13	GO:2000106	BP	regulation of leukocyte apoptotic process	13/293	162/38701	4.98432e-07	0.000115854
25	GO:0002819	BP	regulation of adaptive immune response	25/293	296/38701	5.03195e-07	0.000115854
27	GO:1902105	BP	regulation of leukocyte differentiation	27/293	456/38701	5.0378e-07	0.000115854
17	GO:0002685	BP	regulation of leukocyte migration	17/293	347/38701	5.07714e-07	0.000115854
8	GO:0007159	BP	leukocyte cell-cell adhesion	8/293	63/38701	5.10964e-07	0.000115854
18	GO:0050853	BP	B cell receptor signaling pathway	18/293	204/38701	5.17431e-07	0.000115854
23	GO:0032496	BP	response to lipopolysaccharide	23/293	638/38701	5.22097e-07	0.000115854
10	GO:0001776	BP	leukocyte homeostasis	10/293	92/38701	5.26574e-07	0.000115854
24	GO:0019221	BP	cytokine-mediated signaling pathway	24/293	516/38701	5.30071e-07	0.000115854
28	GO:0002768	BP	immune response-regulating cell surface receptor signaling pathway	28/293	458/38701	5.33701e-07	0.000115854
62	GO:0002694	BP	regulation of leukocyte activation	62/293	977/38701	5.42897e-07	0.000115854
21	GO:0050671	BP	positive regulation of lymphocyte proliferation	21/293	205/38701	5.43136e-07	0.000115854
30	GO:0050864	BP	regulation of B cell activation	30/293	349/38701	5.43735e-07	0.000115854
13	GO:0050729	BP	positive regulation of inflammatory response	13/293	250/38701	5.44669e-07	0.000115854
28	GO:0055082	BP	cellular chemical homeostasis	28/293	1050/38701	5.5314e-07	0.000115854
28	GO:0045087	BP	innate immune response	28/293	908/38701	5.5897e-07	0.000115854
27	GO:0072507	BP	divalent inorganic cation homeostasis	27/293	641/38701	5.60017e-07	0.000115854
41	GO:0032103	BP	positive regulation of response to external stimulus	41/293	979/38701	5.62872e-07	0.000115854
7	GO:0050855	BP	regulation of B cell receptor signaling pathway	7/293	22/38701	5.69616e-07	0.000115854
20	GO:0042742	BP	defense response to bacterium	20/293	642/38701	5.73205e-07	0.000115854
23	GO:0045785	BP	positive regulation of cell adhesion	23/293	642/38701	5.73205e-07	0.000115854
28	GO:0031349	BP	positive regulation of defense response	28/293	773/38701	5.80201e-07	0.000115854
13	GO:0019882	BP	antigen processing and presentation	13/293	207/38701	5.9795e-07	0.000115854
21	GO:0043087	BP	regulation of GTPase activity	21/293	644/38701	6.00433e-07	0.000115854
24	GO:0030098	BP	lymphocyte differentiation	24/293	352/38701	6.02077e-07	0.000115854
26	GO:0006875	BP	cellular metal ion homeostasis	26/293	775/38701	6.04749e-07	0.000115854
35	GO:0048878	BP	chemical homeostasis	35/293	1675/38701	6.05097e-07	0.000115854
27	GO:0051345	BP	positive regulation of hydrolase activity	27/293	1129/38701	6.0824e-07	0.000115854
34	GO:2000145	BP	regulation of cell motility	34/293	1358/38701	6.19825e-07	0.000115854
32	GO:0030334	BP	regulation of cell migration	32/293	1281/38701	6.20805e-07	0.000115854
38	GO:0050867	BP	positive regulation of cell activation	38/293	710/38701	6.20866e-07	0.000115854
8	GO:0046635	BP	positive regulation of alpha-beta T cell activation	8/293	94/38701	6.21553e-07	0.000115854
26	GO:0006874	BP	cellular calcium ion homeostasis	26/293	583/38701	6.25055e-07	0.000115854
21	GO:0032946	BP	positive regulation of mononuclear cell proliferation	21/293	208/38701	6.27143e-07	0.000115854
9	GO:0097530	BP	granulocyte migration	9/293	128/38701	6.27222e-07	0.000115854
8	GO:0090023	BP	positive regulation of neutrophil chemotaxis	8/293	65/38701	6.34705e-07	0.000115854
31	GO:0098771	BP	inorganic ion homeostasis	31/293	986/38701	6.38238e-07	0.000115854
6	GO:0048535	BP	lymph node development	6/293	41/38701	6.43834e-07	0.000115854
38	GO:0002683	BP	negative regulation of immune system process	38/293	712/38701	6.48462e-07	0.000115854
32	GO:0016477	BP	cell migration	32/293	1284/38701	6.49984e-07	0.000115854
4	GO:1902715	BP	positive regulation of interferon-gamma secretion	4/293	10/38701	6.52128e-07	0.000115854
27	GO:1903037	BP	regulation of leukocyte cell-cell adhesion	27/293	466/38701	6.70146e-07	0.000115854
18	GO:0002705	BP	positive regulation of leukocyte mediated immunity	18/293	255/38701	6.71615e-07	0.000115854
9	GO:0035456	BP	response to interferon-beta	9/293	95/38701	6.74287e-07	0.000115854
61	GO:0032101	BP	regulation of response to external stimulus	61/293	1684/38701	6.80852e-07	0.000115854
16	GO:0032680	BP	regulation of tumor necrosis factor production	16/293	410/38701	6.82998e-07	0.000115854
35	GO:0034097	BP	response to cytokine	35/293	1603/38701	6.84391e-07	0.000115854
19	GO:0002833	BP	positive regulation of response to biotic stimulus	19/293	587/38701	6.8931e-07	0.000115854
20	GO:0002695	BP	negative regulation of leukocyte activation	20/293	256/38701	6.99945e-07	0.000115854
35	GO:0040011	BP	locomotion	35/293	1605/38701	7.02992e-07	0.000115854
8	GO:0032735	BP	positive regulation of interleukin-12 production	8/293	66/38701	7.05439e-07	0.000115854
9	GO:0032715	BP	negative regulation of interleukin-6 production	9/293	66/38701	7.05439e-07	0.000115854
5	GO:0042613	CC	MHC class II protein complex	5/293	14/38701	4.55095e-08	0.000115854
9	GO:0042611	CC	MHC protein complex	9/293	52/38701	1.32656e-07	0.000115854
25	GO:0098797	CC	plasma membrane protein complex	25/293	887/38701	3.73654e-07	0.000115854
4	GO:0019815	CC	B cell receptor complex	4/293	9/38701	3.93626e-07	0.000115854
29	GO:0009986	CC	cell surface	29/293	1110/38701	4.4264e-07	0.000115854
11	GO:0004896	MF	cytokine receptor activity	11/293	127/38701	5.86976e-07	0.000115854
4	GO:0023026	MF	MHC class II protein complex binding	4/293	10/38701	6.52128e-07	0.000115854
44	GO:0046649	BP	lymphocyte activation	44/293	589/38701	7.2364e-07	0.000116074
25	GO:0002699	BP	positive regulation of immune effector process	25/293	412/38701	7.25801e-07	0.000116074
10	GO:0002285	BP	lymphocyte activation involved in immune response	10/293	169/38701	7.35112e-07	0.000116074
21	GO:0030335	BP	positive regulation of cell migration	21/293	785/38701	7.42384e-07	0.000116074
21	GO:0002821	BP	positive regulation of adaptive immune response	21/293	212/38701	7.56878e-07	0.000116074
12	GO:0002687	BP	positive regulation of leukocyte migration	12/293	258/38701	7.59807e-07	0.000116074
10	GO:0001912	BP	positive regulation of leukocyte mediated cytotoxicity	10/293	131/38701	7.6263e-07	0.000116074
60	GO:0050778	BP	positive regulation of immune response	60/293	1295/38701	7.6818e-07	0.000116074
16	GO:1903555	BP	regulation of tumor necrosis factor superfamily cytokine production	16/293	414/38701	7.71006e-07	0.000116074
11	GO:0001910	BP	regulation of leukocyte mediated cytotoxicity	11/293	170/38701	7.75894e-07	0.000116074
26	GO:0002831	BP	regulation of response to biotic stimulus	26/293	856/38701	7.81428e-07	0.000116074
8	GO:0071624	BP	positive regulation of granulocyte chemotaxis	8/293	67/38701	7.82671e-07	0.000116074
26	GO:0050727	BP	regulation of inflammatory response	26/293	531/38701	7.85559e-07	0.000116074
31	GO:0006954	BP	inflammatory response	31/293	656/38701	7.90124e-07	0.000116074
14	GO:0002700	BP	regulation of production of molecular mediator of immune response	14/293	213/38701	7.92792e-07	0.000116074
35	GO:0051251	BP	positive regulation of lymphocyte activation	35/293	593/38701	7.97004e-07	0.000116074
21	GO:1902532	BP	negative regulation of intracellular signal transduction	21/293	789/38701	8.0505e-07	0.000116074
45	GO:0098542	BP	defense response to other organism	45/293	1697/38701	8.05947e-07	0.000116074
38	GO:0040012	BP	regulation of locomotion	38/293	1455/38701	8.09877e-07	0.000116074
12	GO:0001816	BP	cytokine production	12/293	171/38701	8.18639e-07	0.000116074
15	GO:0032649	BP	regulation of interferon-gamma production	15/293	171/38701	8.18639e-07	0.000116074
46	GO:0098552	CC	side of membrane	46/293	925/38701	7.67294e-07	0.000116074
74	GO:0050776	BP	regulation of immune response	74/293	1617/38701	8.24823e-07	0.000116229
36	GO:0002253	BP	activation of immune response	36/293	791/38701	8.38165e-07	0.000117384
23	GO:0002237	BP	response to molecule of bacterial origin	23/293	659/38701	8.45386e-07	0.000117674
10	GO:0050672	BP	negative regulation of lymphocyte proliferation	10/293	98/38701	8.56029e-07	0.000118433
10	GO:0097529	BP	myeloid leukocyte migration	10/293	172/38701	8.63427e-07	0.000118471
75	GO:0006955	BP	immune response	75/293	2119/38701	8.71378e-07	0.000118471
42	GO:0009617	BP	response to bacterium	42/293	932/38701	8.72161e-07	0.000118471
25	GO:0006935	BP	chemotaxis	25/293	597/38701	8.77067e-07	0.000118471
28	GO:0030003	BP	cellular cation homeostasis	28/293	863/38701	8.93491e-07	0.00011998
41	GO:0010648	BP	negative regulation of cell communication	41/293	1922/38701	9.02919e-07	0.000120537
23	GO:0051272	BP	positive regulation of cellular component movement	23/293	864/38701	9.1065e-07	0.000120862
41	GO:0023057	BP	negative regulation of signaling	41/293	1926/38701	9.22637e-07	0.000121385
10	GO:0032945	BP	negative regulation of mononuclear cell proliferation	10/293	99/38701	9.25222e-07	0.000121385
31	GO:0002521	BP	leukocyte differentiation	31/293	478/38701	9.34404e-07	0.000121889
35	GO:0050670	BP	regulation of lymphocyte proliferation	35/293	313/38701	9.41572e-07	0.000121891
53	GO:0042592	BP	homeostatic process	53/293	2379/38701	9.45096e-07	0.000121891
69	GO:0007166	BP	cell surface receptor signaling pathway	69/293	2639/38701	9.60928e-07	0.000122987
25	GO:0042330	BP	taxis	25/293	601/38701	9.6437e-07	0.000122987
41	GO:0009897	CC	external side of plasma membrane	41/293	731/38701	9.72412e-07	0.000123323
48	GO:0045321	BP	leukocyte activation	48/293	868/38701	9.82352e-07	0.000123896
6	GO:0002577	BP	regulation of antigen processing and presentation	6/293	44/38701	9.91702e-07	0.000124388
33	GO:0048870	BP	cell motility	33/293	1471/38701	1.01262e-06	0.000125199
58	GO:0042127	BP	regulation of cell population proliferation	58/293	2648/38701	1.0138e-06	0.000125199
4	GO:0070486	BP	leukocyte aggregation	4/293	11/38701	1.01866e-06	0.000125199
23	GO:0040017	BP	positive regulation of locomotion	23/293	870/38701	1.02011e-06	0.000125199
36	GO:0051270	BP	regulation of cellular component movement	36/293	1473/38701	1.04103e-06	0.000125969
30	GO:0071345	BP	cellular response to cytokine stimulus	30/293	1394/38701	1.04622e-06	0.000125969
26	GO:0002703	BP	regulation of leukocyte mediated immunity	26/293	369/38701	1.0521e-06	0.000125969
9	GO:0035458	BP	cellular response to interferon-beta	9/293	70/38701	1.05819e-06	0.000125969
26	GO:0055074	BP	calcium ion homeostasis	26/293	605/38701	1.05949e-06	0.000125969
43	GO:0005576	CC	extracellular region	43/293	2393/38701	1.05493e-06	0.000125969
29	GO:0055065	BP	metal ion homeostasis	29/293	873/38701	1.07924e-06	0.000126844
26	GO:0072503	BP	cellular divalent inorganic cation homeostasis	26/293	606/38701	1.08457e-06	0.000126844
35	GO:0032944	BP	regulation of mononuclear cell proliferation	35/293	317/38701	1.08466e-06	0.000126844
21	GO:0070665	BP	positive regulation of leukocyte proliferation	21/293	220/38701	1.08908e-06	0.000126844
32	GO:0050863	BP	regulation of T cell activation	32/293	485/38701	1.12888e-06	0.000130151
5	GO:0016493	MF	C-C chemokine receptor activity	5/293	25/38701	1.12803e-06	0.000130151
14	GO:0002688	BP	regulation of leukocyte chemotaxis	14/293	221/38701	1.13851e-06	0.000130603
21	GO:0043547	BP	positive regulation of GTPase activity	21/293	546/38701	1.14802e-06	0.000131035
68	GO:0006952	BP	defense response	68/293	2301/38701	1.1681e-06	0.000132663
31	GO:0022407	BP	regulation of cell-cell adhesion	31/293	610/38701	1.19035e-06	0.000133872
57	GO:0080134	BP	regulation of response to stress	57/293	2304/38701	1.19047e-06	0.000133872
31	GO:0002757	BP	immune response-activating signal transduction	31/293	548/38701	1.20637e-06	0.000134494
48	GO:0010647	BP	positive regulation of cell communication	48/293	2674/38701	1.20778e-06	0.000134494
80	GO:0043207	BP	response to external biotic stimulus	80/293	2558/38701	1.22938e-06	0.000135256
14	GO:0002366	BP	leukocyte activation involved in immune response	14/293	374/38701	1.2324e-06	0.000135256
12	GO:0003823	MF	antigen binding	12/293	270/38701	1.22419e-06	0.000135256
57	GO:0051049	BP	regulation of transport	57/293	3418/38701	1.27306e-06	0.000138705
28	GO:0006873	BP	cellular ion homeostasis	28/293	882/38701	1.27598e-06	0.000138705
34	GO:0008284	BP	positive regulation of cell population proliferation	34/293	1651/38701	1.28469e-06	0.00013899
6	GO:0043372	BP	positive regulation of CD4-positive, alpha-beta T cell differentiation	6/293	46/38701	1.29931e-06	0.000139801
39	GO:0009968	BP	negative regulation of signal transduction	39/293	1736/38701	1.32111e-06	0.000139801
35	GO:0043900	BP	regulation of multi-organism process	35/293	1736/38701	1.32111e-06	0.000139801
47	GO:0045595	BP	regulation of cell differentiation	47/293	2844/38701	1.32621e-06	0.000139801
48	GO:0023056	BP	positive regulation of signaling	48/293	2687/38701	1.33042e-06	0.000139801
44	GO:0001817	BP	regulation of cytokine production	44/293	1572/38701	1.33333e-06	0.000139801
49	GO:0001775	BP	cell activation	49/293	956/38701	1.33971e-06	0.000139801
30	GO:0019725	BP	cellular homeostasis	30/293	1255/38701	1.3422e-06	0.000139801
8	GO:0050766	BP	positive regulation of phagocytosis	8/293	104/38701	1.3473e-06	0.000139801
36	GO:0002252	BP	immune effector process	36/293	1030/38701	1.36766e-06	0.000140821
48	GO:0044093	BP	positive regulation of molecular function	48/293	2692/38701	1.38263e-06	0.000140821
46	GO:0031347	BP	regulation of defense response	46/293	1257/38701	1.38297e-06	0.000140821
5	GO:0019957	MF	C-C chemokine binding	5/293	26/38701	1.38798e-06	0.000140821
31	GO:0050801	BP	ion homeostasis	31/293	1106/38701	1.40868e-06	0.00014229
51	GO:0005615	CC	extracellular space	51/293	2588/38701	1.42389e-06	0.000143192
80	GO:0009607	BP	response to biotic stimulus	80/293	2589/38701	1.43214e-06	0.00014339
14	GO:0002263	BP	cell activation involved in immune response	14/293	379/38701	1.43986e-06	0.000143534
60	GO:0050790	BP	regulation of catalytic activity	60/293	3812/38701	1.52934e-06	0.00015179
69	GO:0050793	BP	regulation of developmental process	69/293	3989/38701	1.54695e-06	0.000152873
48	GO:0048585	BP	negative regulation of response to stimulus	48/293	2343/38701	1.58468e-06	0.000155095
9	GO:0046634	BP	regulation of alpha-beta T cell activation	9/293	143/38701	1.58862e-06	0.000155095
12	GO:0030099	BP	myeloid cell differentiation	12/293	277/38701	1.59833e-06	0.000155095
22	GO:2000147	BP	positive regulation of cell motility	22/293	824/38701	1.59872e-06	0.000155095
59	GO:2000026	BP	regulation of multicellular organismal development	59/293	3018/38701	1.6034e-06	0.000155095
61	GO:0051240	BP	positive regulation of multicellular organismal process	61/293	3166/38701	1.61154e-06	0.000155224
43	GO:0031410	CC	cytoplasmic vesicle	43/293	2475/38701	1.65403e-06	0.000158648
99	GO:0048584	BP	positive regulation of response to stimulus	99/293	3650/38701	1.68012e-06	0.00015894
51	GO:1902531	BP	regulation of intracellular signal transduction	51/293	2734/38701	1.68492e-06	0.00015894
43	GO:0097708	CC	intracellular vesicle	43/293	2481/38701	1.67387e-06	0.00015894
5	GO:0004950	MF	chemokine receptor activity	5/293	27/38701	1.6929e-06	0.000159035
3	GO:0045658	BP	regulation of neutrophil differentiation	3/293	4/38701	1.70853e-06	0.000159679
40	GO:0043085	BP	positive regulation of catalytic activity	40/293	2096/38701	1.72964e-06	0.000159679
86	GO:0010646	BP	regulation of cell communication	86/293	5004/38701	1.73427e-06	0.000159679
75	GO:0051704	BP	multi-organism process	75/293	3656/38701	1.73833e-06	0.000159679
32	GO:0033993	BP	response to lipid	32/293	1675/38701	1.74172e-06	0.000159679
92	GO:0044459	CC	plasma membrane part	92/293	4396/38701	1.71778e-06	0.000159679
15	GO:0005126	MF	cytokine receptor binding	15/293	443/38701	1.78078e-06	0.000161959
86	GO:0023051	BP	regulation of signaling	86/293	5026/38701	1.80069e-06	0.000162475
59	GO:0005102	MF	signaling receptor binding	59/293	2771/38701	1.79802e-06	0.000162475
89	GO:0006950	BP	response to stress	89/293	5462/38701	1.82029e-06	0.000163597
86	GO:0002684	BP	positive regulation of immune system process	86/293	1802/38701	1.87511e-06	0.000167863
79	GO:0009966	BP	regulation of signal transduction	79/293	4436/38701	1.89508e-06	0.000168879
88	GO:0009605	BP	response to external stimulus	88/293	3697/38701	1.91486e-06	0.000169428
110	GO:0002682	BP	regulation of immune system process	110/293	2521/38701	1.93365e-06	0.000169774
45	GO:1901700	BP	response to oxygen-containing compound	45/293	2793/38701	1.94867e-06	0.000170438
36	GO:0051046	BP	regulation of secretion	36/293	1813/38701	1.96052e-06	0.00017082
16	GO:0009615	BP	response to virus	16/293	508/38701	2.05192e-06	0.000177429
5	GO:0001637	MF	G protein-coupled chemoattractant receptor activity	5/293	28/38701	2.04818e-06	0.000177429
41	GO:0051094	BP	positive regulation of developmental process	41/293	2153/38701	2.08004e-06	0.000179182
63	GO:0044421	CC	extracellular region part	63/293	3916/38701	2.13108e-06	0.000182889
6	GO:2000516	BP	positive regulation of CD4-positive, alpha-beta T cell activation	6/293	50/38701	2.149e-06	0.000183735
4	GO:1902713	BP	regulation of interferon-gamma secretion	4/293	13/38701	2.18085e-06	0.000184496
70	GO:0051707	BP	response to other organism	70/293	2168/38701	2.19643e-06	0.000185019
84	GO:0065008	BP	regulation of biological quality	84/293	6090/38701	2.34873e-06	0.000194717
72	GO:0065009	BP	regulation of molecular function	72/293	4899/38701	2.37841e-06	0.000195304
82	GO:0032879	BP	regulation of localization	82/293	4726/38701	2.40739e-06	0.000196975
6	GO:0001772	CC	immunological synapse	6/293	51/38701	2.42013e-06	0.000196998
19	GO:0045088	BP	regulation of innate immune response	19/293	709/38701	2.4643e-06	0.000199226
44	GO:0009967	BP	positive regulation of signal transduction	44/293	2431/38701	2.46981e-06	0.000199226
121	GO:0002376	BP	immune system process	121/293	3463/38701	2.49647e-06	0.000200667
98	GO:0048523	BP	negative regulation of cellular process	98/293	7872/38701	2.5425e-06	0.000201528
137	GO:0048583	BP	regulation of response to stimulus	137/293	6145/38701	2.56816e-06	0.000202858
7	GO:0072676	BP	lymphocyte migration	7/293	80/38701	2.62898e-06	0.000206946
124	GO:0048522	BP	positive regulation of cellular process	124/293	9326/38701	2.64134e-06	0.000207204
12	GO:0019955	MF	cytokine binding	12/293	293/38701	2.85538e-06	0.000222467
5	GO:0002335	BP	mature B cell differentiation	5/293	30/38701	2.93328e-06	0.000224701
5	GO:0050857	BP	positive regulation of antigen receptor-mediated signaling pathway	5/293	30/38701	2.93328e-06	0.000224701
5	GO:0042608	MF	T cell receptor binding	5/293	30/38701	2.93328e-06	0.000224701
8	GO:0002526	BP	acute inflammatory response	8/293	116/38701	3.07277e-06	0.000233817
221	GO:0050789	BP	regulation of biological process	221/293	20131/38701	3.14228e-06	0.000235757
157	GO:0050896	BP	response to stimulus	157/293	10903/38701	3.14737e-06	0.000235757
107	GO:0048519	BP	negative regulation of biological process	107/293	9149/38701	3.1499e-06	0.000235757
152	GO:0048518	BP	positive regulation of biological process	152/293	10390/38701	3.17442e-06	0.000236045
89	GO:0051239	BP	regulation of multicellular organismal process	89/293	5097/38701	3.2636e-06	0.000241888
149	GO:0044425	CC	membrane part	149/293	14215/38701	3.29394e-06	0.000242986
169	GO:0016020	CC	membrane	169/293	14222/38701	3.29971e-06	0.000242986
112	GO:0007165	BP	signal transduction	112/293	7790/38701	3.36803e-06	0.000245504
111	GO:0005886	CC	plasma membrane	111/293	7795/38701	3.37692e-06	0.000245504
51	GO:0098772	MF	molecular function regulator	51/293	3396/38701	3.4761e-06	0.000251115
10	GO:0030217	BP	T cell differentiation	10/293	201/38701	3.51892e-06	0.000253406
9	GO:0046651	BP	lymphocyte proliferation	9/293	158/38701	3.62094e-06	0.000258505
27	GO:0002791	BP	regulation of peptide secretion	27/293	1324/38701	3.6237e-06	0.000258505
9	GO:0032943	BP	mononuclear cell proliferation	9/293	159/38701	3.81303e-06	0.000268654
53	GO:0030154	BP	cell differentiation	53/293	3571/38701	3.84554e-06	0.000270111
228	GO:0065007	BP	biological regulation	228/293	21079/38701	3.87208e-06	0.00027114
192	GO:0005515	MF	protein binding	192/293	15904/38701	3.9101e-06	0.000272966
13	GO:0032675	BP	regulation of interleukin-6 production	13/293	357/38701	3.99911e-06	0.000278328
4	GO:0023023	MF	MHC protein complex binding	4/293	15/38701	4.11394e-06	0.00028545
203	GO:0050794	BP	regulation of cellular process	203/293	18428/38701	4.12688e-06	0.00028548
37	GO:0051050	BP	positive regulation of transport	37/293	2160/38701	4.15277e-06	0.000286403
32	GO:1903530	BP	regulation of secretion by cell	32/293	1702/38701	4.23158e-06	0.000290086
36	GO:0006928	BP	movement of cell or subcellular component	36/293	2036/38701	4.40268e-06	0.000300911
30	GO:0045597	BP	positive regulation of cell differentiation	30/293	1592/38701	4.90167e-06	0.000334016
67	GO:0048869	BP	cellular developmental process	67/293	5087/38701	4.99039e-06	0.00033905
6	GO:0002639	BP	positive regulation of immunoglobulin production	6/293	58/38701	5.20291e-06	0.00035244
16	GO:0045089	BP	positive regulation of innate immune response	16/293	547/38701	5.24011e-06	0.000353909
7	GO:0032720	BP	negative regulation of tumor necrosis factor production	7/293	89/38701	5.38085e-06	0.000362342
4	GO:0062061	MF	TAP complex binding	4/293	16/38701	5.45256e-06	0.000366092
22	GO:0008285	BP	negative regulation of cell population proliferation	22/293	971/38701	5.93262e-06	0.000397155
6	GO:0045577	BP	regulation of B cell differentiation	6/293	60/38701	6.3544e-06	0.00042291
10	GO:0006911	BP	phagocytosis, engulfment	10/293	215/38701	6.38422e-06	0.00042366
5	GO:0002827	BP	positive regulation of T-helper 1 type immune response	5/293	35/38701	6.47828e-06	0.000428656
7	GO:1903556	BP	negative regulation of tumor necrosis factor superfamily cytokine production	7/293	92/38701	6.71047e-06	0.000442736
9	GO:0070661	BP	leukocyte proliferation	9/293	171/38701	6.89502e-06	0.000453601
4	GO:0002923	BP	regulation of humoral immune response mediated by circulating immunoglobulin	4/293	17/38701	7.08779e-06	0.000463611
4	GO:0048302	BP	regulation of isotype switching to IgG isotypes	4/293	17/38701	7.08779e-06	0.000463611
10	GO:0050777	BP	negative regulation of immune response	10/293	218/38701	7.2103e-06	0.000470277
6	GO:0031985	CC	Golgi cisterna	6/293	62/38701	7.70443e-06	0.000501073
49	GO:0031982	CC	vesicle	49/293	3338/38701	8.09155e-06	0.000523269
41	GO:0035556	BP	intracellular signal transduction	41/293	2583/38701	8.69926e-06	0.000560979
4	GO:0042610	MF	CD8 receptor binding	4/293	18/38701	9.05859e-06	0.000582506
11	GO:0048534	BP	hematopoietic or lymphoid organ development	11/293	279/38701	1.05954e-05	0.000679418
25	GO:0000977	MF	RNA polymerase II regulatory region sequence-specific DNA binding	25/293	1243/38701	1.0644e-05	0.000680617
14	GO:0043405	BP	regulation of MAP kinase activity	14/293	452/38701	1.08005e-05	0.000688696
25	GO:0001012	MF	RNA polymerase II regulatory region DNA binding	25/293	1248/38701	1.1387e-05	0.000724075
37	GO:0051336	BP	regulation of hydrolase activity	37/293	2240/38701	1.19155e-05	0.000755574
10	GO:0099024	BP	plasma membrane invagination	10/293	231/38701	1.19495e-05	0.000755629
8	GO:0002573	BP	myeloid leukocyte differentiation	8/293	140/38701	1.23501e-05	0.000778805
7	GO:0070228	BP	regulation of lymphocyte apoptotic process	7/293	102/38701	1.32634e-05	0.000834099
4	GO:0030881	MF	beta-2-microglobulin binding	4/293	20/38701	1.41725e-05	0.000888816
12	GO:0002218	BP	activation of innate immune response	12/293	344/38701	1.44165e-05	0.000901644
13	GO:0071216	BP	cellular response to biotic stimulus	13/293	403/38701	1.45697e-05	0.000908736
3	GO:0034627	BP	'de novo' NAD biosynthetic process	3/293	7/38701	1.46992e-05	0.000911827
3	GO:0034354	BP	de novo' NAD biosynthetic process from tryptophan	3/293	7/38701	1.46992e-05	0.000911827
10	GO:0010324	BP	membrane invagination	10/293	238/38701	1.54686e-05	0.000956959
6	GO:0032663	BP	regulation of interleukin-2 production	6/293	70/38701	1.56205e-05	0.000963745
65	GO:0010033	BP	response to organic substance	65/293	5038/38701	1.57923e-05	0.000971713
5	GO:0045191	BP	regulation of isotype switching	5/293	42/38701	1.62561e-05	0.000997562
20	GO:0000978	MF	RNA polymerase II proximal promoter sequence-specific DNA binding	20/293	885/38701	1.6433e-05	0.00100571
4	GO:0046977	MF	TAP binding	4/293	21/38701	1.7403e-05	0.00106223
8	GO:0050764	BP	regulation of phagocytosis	8/293	147/38701	1.76067e-05	0.00106895
10	GO:0098802	CC	plasma membrane receptor complex	10/293	242/38701	1.78544e-05	0.00108111
5	GO:0001782	BP	B cell homeostasis	5/293	43/38701	1.82816e-05	0.00110405
21	GO:0043269	BP	regulation of ion transport	21/293	970/38701	1.90188e-05	0.00114554
8	GO:0071347	BP	cellular response to interleukin-1	8/293	149/38701	1.94145e-05	0.0011663
12	GO:0071222	BP	cellular response to lipopolysaccharide	12/293	356/38701	2.02139e-05	0.00120685
19	GO:0060627	BP	regulation of vesicle-mediated transport	19/293	824/38701	2.03751e-05	0.00120812
8	GO:0050852	BP	T cell receptor signaling pathway	8/293	150/38701	2.03753e-05	0.00120812
5	GO:0002825	BP	regulation of T-helper 1 type immune response	5/293	44/38701	2.04982e-05	0.00121226
29	GO:1902533	BP	positive regulation of intracellular signal transduction	29/293	1616/38701	2.12038e-05	0.00125075
9	GO:0070555	BP	response to interleukin-1	9/293	197/38701	2.13817e-05	0.00125476
9	GO:0046330	BP	positive regulation of JNK cascade	9/293	197/38701	2.13817e-05	0.00125476
6	GO:0046638	BP	positive regulation of alpha-beta T cell differentiation	6/293	74/38701	2.15182e-05	0.00125631
6	GO:0043370	BP	regulation of CD4-positive, alpha-beta T cell differentiation	6/293	74/38701	2.15182e-05	0.00125631
3	GO:0002925	BP	positive regulation of humoral immune response mediated by circulating immunoglobulin	3/293	8/38701	2.33867e-05	0.001355
3	GO:0048305	BP	immunoglobulin secretion	3/293	8/38701	2.33867e-05	0.001355
3	GO:0035662	MF	Toll-like receptor 4 binding	3/293	8/38701	2.33867e-05	0.001355
8	GO:0048002	BP	antigen processing and presentation of peptide antigen	8/293	154/38701	2.46272e-05	0.00142327
4	GO:0002863	BP	positive regulation of inflammatory response to antigenic stimulus	4/293	23/38701	2.54427e-05	0.00146668
5	GO:0034122	BP	negative regulation of toll-like receptor signaling pathway	5/293	46/38701	2.55549e-05	0.00146944
15	GO:0032970	BP	regulation of actin filament-based process	15/293	555/38701	2.58633e-05	0.00148344
12	GO:0071219	BP	cellular response to molecule of bacterial origin	12/293	369/38701	2.86947e-05	0.00164171
4	GO:0042824	CC	MHC class I peptide loading complex	4/293	24/38701	3.03497e-05	0.00172774
236	GO:0005488	MF	binding	236/293	26941/38701	3.09137e-05	0.00175547
14	GO:0032956	BP	regulation of actin cytoskeleton organization	14/293	498/38701	3.13932e-05	0.00177722
5	GO:0002504	BP	antigen processing and presentation of peptide or polysaccharide antigen via MHC class II	5/293	48/38701	3.15302e-05	0.00177722
5	GO:0042169	MF	SH2 domain binding	5/293	48/38701	3.15302e-05	0.00177722
101	GO:0032502	BP	developmental process	101/293	9181/38701	3.18666e-05	0.00179175
9	GO:0019814	CC	immunoglobulin complex	9/293	209/38701	3.40137e-05	0.00190392
20	GO:0000987	MF	proximal promoter sequence-specific DNA binding	20/293	932/38701	3.40284e-05	0.00190392
3	GO:0046218	BP	indolalkylamine catabolic process	3/293	9/38701	3.48832e-05	0.00193026
3	GO:0006569	BP	tryptophan catabolic process	3/293	9/38701	3.48832e-05	0.00193026
3	GO:0042436	BP	indole-containing compound catabolic process	3/293	9/38701	3.48832e-05	0.00193026
3	GO:0016494	MF	C-X-C chemokine receptor activity	3/293	9/38701	3.48832e-05	0.00193026
6	GO:0042130	BP	negative regulation of T cell proliferation	6/293	81/38701	3.60651e-05	0.00198863
4	GO:0030852	BP	regulation of granulocyte differentiation	4/293	26/38701	4.21935e-05	0.00231537
4	GO:0071556	CC	integral component of lumenal side of endoplasmic reticulum membrane	4/293	26/38701	4.21935e-05	0.00231537
6	GO:0001916	BP	positive regulation of T cell mediated cytotoxicity	6/293	84/38701	4.43225e-05	0.00242056
6	GO:0030670	CC	phagocytic vesicle membrane	6/293	84/38701	4.43225e-05	0.00242056
27	GO:0000976	MF	transcription regulatory region sequence-specific DNA binding	27/293	1509/38701	4.48839e-05	0.00244537
5	GO:0002823	BP	negative regulation of adaptive immune response based on somatic recombination of immune receptors built from immunoglobulin superfamily domains	5/293	52/38701	4.66892e-05	0.00253767
17	GO:0071900	BP	regulation of protein serine/threonine kinase activity	17/293	727/38701	4.68275e-05	0.00253914
4	GO:0001767	BP	establishment of lymphocyte polarity	4/293	27/38701	4.9237e-05	0.0026509
4	GO:0001768	BP	establishment of T cell polarity	4/293	27/38701	4.9237e-05	0.0026509
4	GO:0002523	BP	leukocyte migration involved in inflammatory response	4/293	27/38701	4.9237e-05	0.0026509
8	GO:0051282	BP	regulation of sequestering of calcium ion	8/293	171/38701	5.19187e-05	0.0027887
24	GO:0007155	BP	cell adhesion	24/293	1289/38701	5.44419e-05	0.00291737
11	GO:0043406	BP	positive regulation of MAP kinase activity	11/293	334/38701	5.50113e-05	0.00294098
8	GO:0019722	BP	calcium-mediated signaling	8/293	173/38701	5.63544e-05	0.00298409
30	GO:0051241	BP	negative regulation of multicellular organismal process	30/293	1786/38701	5.69122e-05	0.00298409
2	GO:0002518	BP	lymphocyte chemotaxis across high endothelial venule	2/293	2/38701	5.71238e-05	0.00298409
2	GO:0045660	BP	positive regulation of neutrophil differentiation	2/293	2/38701	5.71238e-05	0.00298409
2	GO:0002380	BP	immunoglobulin secretion involved in immune response	2/293	2/38701	5.71238e-05	0.00298409
2	GO:0034276	BP	kynurenic acid biosynthetic process	2/293	2/38701	5.71238e-05	0.00298409
2	GO:0034275	BP	kynurenic acid metabolic process	2/293	2/38701	5.71238e-05	0.00298409
2	GO:0070488	BP	neutrophil aggregation	2/293	2/38701	5.71238e-05	0.00298409
2	GO:0002587	BP	negative regulation of antigen processing and presentation of peptide antigen via MHC class II	2/293	2/38701	5.71238e-05	0.00298409
44	GO:0071310	BP	cellular response to organic substance	44/293	3119/38701	5.71249e-05	0.00298409
7	GO:0002221	BP	pattern recognition receptor signaling pathway	7/293	128/38701	5.74431e-05	0.00299386
5	GO:0002486	BP	antigen processing and presentation of endogenous peptide antigen via MHC class I via ER pathway, TAP-independent	5/293	55/38701	6.13477e-05	0.0031852
6	GO:2000514	BP	regulation of CD4-positive, alpha-beta T cell activation	6/293	89/38701	6.13934e-05	0.0031852
6	GO:0001914	BP	regulation of T cell mediated cytotoxicity	6/293	90/38701	6.53645e-05	0.00337589
4	GO:0045061	BP	thymic T cell selection	4/293	29/38701	6.58446e-05	0.003393
5	GO:0097028	BP	dendritic cell differentiation	5/293	56/38701	6.69478e-05	0.00344208
3	GO:0002676	BP	regulation of chronic inflammatory response	3/293	11/38701	6.77543e-05	0.00346792
3	GO:0032725	BP	positive regulation of granulocyte macrophage colony-stimulating factor production	3/293	11/38701	6.77543e-05	0.00346792
9	GO:0009306	BP	protein secretion	9/293	229/38701	6.89645e-05	0.00352197
9	GO:0071692	BP	protein localization to extracellular region	9/293	230/38701	7.13044e-05	0.00362525
9	GO:0035592	BP	establishment of protein localization to extracellular region	9/293	230/38701	7.13044e-05	0.00362525
5	GO:0002820	BP	negative regulation of adaptive immune response	5/293	57/38701	7.29337e-05	0.00369164
5	GO:0002484	BP	antigen processing and presentation of endogenous peptide antigen via MHC class I via ER pathway	5/293	57/38701	7.29337e-05	0.00369164
49	GO:0070887	BP	cellular response to chemical stimulus	49/293	3635/38701	7.31862e-05	0.00369623
6	GO:0002886	BP	regulation of myeloid leukocyte mediated immunity	6/293	92/38701	7.39214e-05	0.00372511
4	GO:0002407	BP	dendritic cell chemotaxis	4/293	30/38701	7.55233e-05	0.00378911
4	GO:0005797	CC	Golgi medial cisterna	4/293	30/38701	7.55233e-05	0.00378911
70	GO:0042221	BP	response to chemical	70/293	5867/38701	7.84299e-05	0.00392233
6	GO:0046631	BP	alpha-beta T cell activation	6/293	93/38701	7.85221e-05	0.00392233
16	GO:0032940	BP	secretion by cell	16/293	686/38701	8.04649e-05	0.00401059
13	GO:0030695	MF	GTPase regulator activity	13/293	479/38701	8.54333e-05	0.00424896
5	GO:0048247	BP	lymphocyte chemotaxis	5/293	59/38701	8.61353e-05	0.00426834
4	GO:0001771	BP	immunological synapse formation	4/293	31/38701	8.6197e-05	0.00426834
3	GO:0072610	BP	interleukin-12 secretion	3/293	12/38701	8.98327e-05	0.00443457
11	GO:0050730	BP	regulation of peptidyl-tyrosine phosphorylation	11/293	353/38701	8.99424e-05	0.00443457
5	GO:0002476	BP	antigen processing and presentation of endogenous peptide antigen via MHC class Ib	5/293	60/38701	9.33881e-05	0.00459453
6	GO:0043507	BP	positive regulation of JUN kinase activity	6/293	97/38701	9.92584e-05	0.00483128
6	GO:0002224	BP	toll-like receptor signaling pathway	6/293	97/38701	9.92584e-05	0.00483128
6	GO:0042379	MF	chemokine receptor binding	6/293	97/38701	9.92584e-05	0.00483128
29	GO:0090087	BP	regulation of peptide transport	29/293	1763/38701	9.98976e-05	0.00485205
22	GO:0043408	BP	regulation of MAPK cascade	22/293	1173/38701	0.000100696	0.00488045
5	GO:0002428	BP	antigen processing and presentation of peptide antigen via MHC class Ib	5/293	61/38701	0.000101101	0.00488969
9	GO:0034612	BP	response to tumor necrosis factor	9/293	241/38701	0.000101769	0.00491158
10	GO:0030832	BP	regulation of actin filament length	10/293	298/38701	0.000102507	0.00492637
6	GO:0034121	BP	regulation of toll-like receptor signaling pathway	6/293	98/38701	0.000105067	0.00503723
5	GO:0098586	BP	cellular response to virus	5/293	62/38701	0.000109294	0.00521958
4	GO:0001891	CC	phagocytic cup	4/293	33/38701	0.000110772	0.00527911
24	GO:0022610	BP	biological adhesion	24/293	1321/38701	0.000115987	0.00545468
3	GO:0046643	BP	regulation of gamma-delta T cell activation	3/293	13/38701	0.000116128	0.00545468
3	GO:0006568	BP	tryptophan metabolic process	3/293	13/38701	0.000116128	0.00545468
3	GO:0045586	BP	regulation of gamma-delta T cell differentiation	3/293	13/38701	0.000116128	0.00545468
3	GO:0006586	BP	indolalkylamine metabolic process	3/293	13/38701	0.000116128	0.00545468
3	GO:0032645	BP	regulation of granulocyte macrophage colony-stimulating factor production	3/293	13/38701	0.000116128	0.00545468
10	GO:0051607	BP	defense response to virus	10/293	303/38701	0.000117438	0.00550489
15	GO:0012506	CC	vesicle membrane	15/293	638/38701	0.000122804	0.00574463
9	GO:0032874	BP	positive regulation of stress-activated MAPK cascade	9/293	248/38701	0.000126329	0.00588541
9	GO:0050731	BP	positive regulation of peptidyl-tyrosine phosphorylation	9/293	248/38701	0.000126329	0.00588541
5	GO:0019885	BP	antigen processing and presentation of endogenous peptide antigen via MHC class I	5/293	64/38701	0.000127199	0.00591383
6	GO:0046637	BP	regulation of alpha-beta T cell differentiation	6/293	102/38701	0.000131057	0.00608085
5	GO:0002475	BP	antigen processing and presentation via MHC class Ib	5/293	65/38701	0.000136952	0.00634147
9	GO:0070304	BP	positive regulation of stress-activated protein kinase signaling cascade	9/293	251/38701	0.000138277	0.00638985
18	GO:0046903	BP	secretion	18/293	874/38701	0.000139905	0.00645201
9	GO:0002790	BP	peptide secretion	9/293	252/38701	0.000142463	0.00655676
3	GO:0030854	BP	positive regulation of granulocyte differentiation	3/293	14/38701	0.000146972	0.00671015
3	GO:2000849	BP	regulation of glucocorticoid secretion	3/293	14/38701	0.000146972	0.00671015
3	GO:0032635	BP	interleukin-6 production	3/293	14/38701	0.000146972	0.00671015
3	GO:0031735	MF	CCR10 chemokine receptor binding	3/293	14/38701	0.000146972	0.00671015
8	GO:0000187	BP	activation of MAPK activity	8/293	200/38701	0.000154336	0.00701827
11	GO:0051048	BP	negative regulation of secretion	11/293	376/38701	0.000156149	0.00708058
4	GO:0002724	BP	regulation of T cell cytokine production	4/293	36/38701	0.000156636	0.00708058
4	GO:0042612	CC	MHC class I protein complex	4/293	36/38701	0.000156636	0.00708058
5	GO:0033003	BP	regulation of mast cell activation	5/293	67/38701	0.000158167	0.00709359
5	GO:0002483	BP	antigen processing and presentation of endogenous peptide antigen	5/293	67/38701	0.000158167	0.00709359
5	GO:0042605	MF	peptide antigen binding	5/293	67/38701	0.000158167	0.00709359
5	GO:0008009	MF	chemokine activity	5/293	67/38701	0.000158167	0.00709359
11	GO:0008037	BP	cell recognition	11/293	377/38701	0.000159781	0.00715191
7	GO:0002702	BP	positive regulation of production of molecular mediator of immune response	7/293	152/38701	0.000168446	0.0075144
2	GO:2000522	BP	positive regulation of immunological synapse formation	2/293	3/38701	0.000170512	0.0075144
2	GO:0019805	BP	quinolinate biosynthetic process	2/293	3/38701	0.000170512	0.0075144
2	GO:0043420	BP	anthranilate metabolic process	2/293	3/38701	0.000170512	0.0075144
2	GO:0002344	BP	B cell affinity maturation	2/293	3/38701	0.000170512	0.0075144
2	GO:0001787	BP	natural killer cell proliferation	2/293	3/38701	0.000170512	0.0075144
2	GO:0002581	BP	negative regulation of antigen processing and presentation of peptide or polysaccharide antigen via MHC class II	2/293	3/38701	0.000170512	0.0075144
2	GO:0002343	BP	peripheral B cell selection	2/293	3/38701	0.000170512	0.0075144
4	GO:0045589	BP	regulation of regulatory T cell differentiation	4/293	37/38701	0.000174581	0.0076494
4	GO:0036336	BP	dendritic cell migration	4/293	37/38701	0.000174581	0.0076494
27	GO:0044212	MF	transcription regulatory region DNA binding	27/293	1628/38701	0.000174211	0.0076494
11	GO:0007015	BP	actin filament organization	11/293	382/38701	0.000179033	0.00782942
27	GO:0001067	MF	regulatory region nucleic acid binding	27/293	1634/38701	0.000180166	0.00786392
23	GO:0050708	BP	regulation of protein secretion	23/293	1280/38701	0.000182041	0.00789842
3	GO:0045072	BP	regulation of interferon-gamma biosynthetic process	3/293	15/38701	0.000182686	0.00789842
3	GO:0097029	BP	mature conventional dendritic cell differentiation	3/293	15/38701	0.000182686	0.00789842
3	GO:0045059	BP	positive thymic T cell selection	3/293	15/38701	0.000182686	0.00789842
3	GO:0045236	MF	CXCR chemokine receptor binding	3/293	15/38701	0.000182686	0.00789842
12	GO:0005096	MF	GTPase activator activity	12/293	450/38701	0.000187067	0.00807251
16	GO:0140352	BP	export from cell	16/293	739/38701	0.000187671	0.00807857
13	GO:0043235	CC	receptor complex	13/293	519/38701	0.000187915	0.00807857
17	GO:0048018	MF	receptor ligand activity	17/293	817/38701	0.000189587	0.00813514
27	GO:1990837	MF	sequence-specific double-stranded DNA binding	27/293	1646/38701	0.000193634	0.00829321
5	GO:0019883	BP	antigen processing and presentation of endogenous antigen	5/293	70/38701	0.000194588	0.00831845
10	GO:0043122	BP	regulation of I-kappaB kinase/NF-kappaB signaling	10/293	324/38701	0.000201851	0.00859676
17	GO:0030546	MF	signaling receptor activator activity	17/293	822/38701	0.000203551	0.00865301
42	GO:0031399	BP	regulation of protein modification process	42/293	3097/38701	0.000211967	0.00899403
6	GO:2000401	BP	regulation of lymphocyte migration	6/293	112/38701	0.00021863	0.00922532
12	GO:0071902	BP	positive regulation of protein serine/threonine kinase activity	12/293	458/38701	0.000219716	0.00925401
7	GO:0002758	BP	innate immune response-activating signal transduction	7/293	159/38701	0.000222122	0.00933812
9	GO:1904018	BP	positive regulation of vasculature development	9/293	268/38701	0.000225251	0.00945226
289	GO:0005575	CC	cellular_component	289/293	36447/38701	0.000231791	0.00970885
10	GO:0051924	BP	regulation of calcium ion transport	10/293	330/38701	0.000233716	0.00977157
5	GO:0030865	BP	cortical cytoskeleton organization	5/293	73/38701	0.000237074	0.00983166
4	GO:0032660	BP	regulation of interleukin-17 production	4/293	40/38701	0.000237307	0.00983166
4	GO:0019362	BP	pyridine nucleotide metabolic process	4/293	40/38701	0.000237307	0.00983166
4	GO:0032743	BP	positive regulation of interleukin-2 production	4/293	40/38701	0.000237307	0.00983166
4	GO:0046496	BP	nicotinamide nucleotide metabolic process	4/293	40/38701	0.000237307	0.00983166
9	GO:0046328	BP	regulation of JNK cascade	9/293	272/38701	0.000251246	0.0103903
12	GO:0051056	BP	regulation of small GTPase mediated signal transduction	12/293	465/38701	0.000252151	0.0103937
5	GO:0042100	BP	B cell proliferation	5/293	74/38701	0.000252694	0.0103937
5	GO:0050710	BP	negative regulation of cytokine secretion	5/293	74/38701	0.000252694	0.0103937
7	GO:0050868	BP	negative regulation of T cell activation	7/293	163/38701	0.000258498	0.0106133
3	GO:0045060	BP	negative thymic T cell selection	3/293	17/38701	0.000269979	0.0109275
3	GO:0002638	BP	negative regulation of immunoglobulin production	3/293	17/38701	0.000269979	0.0109275
3	GO:0002408	BP	myeloid dendritic cell chemotaxis	3/293	17/38701	0.000269979	0.0109275
3	GO:0006968	BP	cellular defense response	3/293	17/38701	0.000269979	0.0109275
3	GO:0002885	BP	positive regulation of hypersensitivity	3/293	17/38701	0.000269979	0.0109275
3	GO:0043373	BP	CD4-positive, alpha-beta T cell lineage commitment	3/293	17/38701	0.000269979	0.0109275
3	GO:0042834	MF	peptidoglycan binding	3/293	17/38701	0.000269979	0.0109275
3	GO:0035325	MF	Toll-like receptor binding	3/293	17/38701	0.000269979	0.0109275
13	GO:0010959	BP	regulation of metal ion transport	13/293	541/38701	0.000280089	0.0112966
14	GO:0003779	MF	actin binding	14/293	617/38701	0.000294378	0.0118103
6	GO:0030666	CC	endocytic vesicle membrane	6/293	119/38701	0.000303449	0.0121529
4	GO:0050849	BP	negative regulation of calcium-mediated signaling	4/293	43/38701	0.000314791	0.012563
4	GO:0002701	BP	negative regulation of production of molecular mediator of immune response	4/293	43/38701	0.000314791	0.012563
22	GO:0043902	BP	positive regulation of multi-organism process	22/293	1255/38701	0.00032047	0.0127238
3	GO:2000510	BP	positive regulation of dendritic cell chemotaxis	3/293	18/38701	0.000322163	0.0127238
3	GO:0031650	BP	regulation of heat generation	3/293	18/38701	0.000322163	0.0127238
3	GO:0043383	BP	negative T cell selection	3/293	18/38701	0.000322163	0.0127238
3	GO:0045627	BP	positive regulation of T-helper 1 cell differentiation	3/293	18/38701	0.000322163	0.0127238
3	GO:0043368	BP	positive T cell selection	3/293	18/38701	0.000322163	0.0127238
11	GO:0001664	MF	G protein-coupled receptor binding	11/293	410/38701	0.000327146	0.0128983
8	GO:0050709	BP	negative regulation of protein secretion	8/293	224/38701	0.000332193	0.0130747
2	GO:0031580	BP	membrane raft distribution	2/293	4/38701	0.000339316	0.0132863
2	GO:0002584	BP	negative regulation of antigen processing and presentation of peptide antigen	2/293	4/38701	0.000339316	0.0132863
13	GO:0060589	MF	nucleoside-triphosphatase regulator activity	13/293	552/38701	0.000339117	0.0132863
4	GO:0070971	CC	endoplasmic reticulum exit site	4/293	44/38701	0.000344221	0.0134553
6	GO:0090630	BP	activation of GTPase activity	6/293	123/38701	0.000362364	0.0141402
17	GO:0030545	MF	receptor regulator activity	17/293	865/38701	0.000365598	0.0142421
3	GO:0045591	BP	positive regulation of regulatory T cell differentiation	3/293	19/38701	0.00038043	0.0147695
3	GO:0002866	BP	positive regulation of acute inflammatory response to antigenic stimulus	3/293	19/38701	0.00038043	0.0147695
5	GO:0042108	BP	positive regulation of cytokine biosynthetic process	5/293	81/38701	0.000384991	0.0148959
5	GO:0002686	BP	negative regulation of leukocyte migration	5/293	81/38701	0.000384991	0.0148959
22	GO:0051047	BP	positive regulation of secretion	22/293	1281/38701	0.000392415	0.015137
23	GO:0043549	BP	regulation of kinase activity	23/293	1378/38701	0.000398154	0.0153273
8	GO:0043123	BP	positive regulation of I-kappaB kinase/NF-kappaB signaling	8/293	231/38701	0.000407685	0.0156677
4	GO:0045058	BP	T cell selection	4/293	46/38701	0.000408902	0.0156881
8	GO:1901981	MF	phosphatidylinositol phosphate binding	8/293	233/38701	0.000431641	0.016505
11	GO:0046883	BP	regulation of hormone secretion	11/293	425/38701	0.000442005	0.0168731
8	GO:0002792	BP	negative regulation of peptide secretion	8/293	234/38701	0.000444041	0.016905
3	GO:0002507	BP	tolerance induction	3/293	20/38701	0.000445064	0.016905
3	GO:2000508	BP	regulation of dendritic cell chemotaxis	3/293	20/38701	0.000445064	0.016905
13	GO:0031341	BP	regulation of cell killing	13/293	572/38701	0.000473778	0.0179658
33	GO:0001932	BP	regulation of protein phosphorylation	33/293	2320/38701	0.000476163	0.0180006
9	GO:0008064	BP	regulation of actin polymerization or depolymerization	9/293	297/38701	0.000476273	0.0180006
4	GO:0002861	BP	regulation of inflammatory response to antigenic stimulus	4/293	48/38701	0.00048182	0.0181801
16	GO:0051051	BP	negative regulation of transport	16/293	806/38701	0.000486224	0.018316
12	GO:0031343	BP	positive regulation of cell killing	12/293	503/38701	0.000508354	0.0191181
8	GO:0045766	BP	positive regulation of angiogenesis	8/293	239/38701	0.000510456	0.0191656
21	GO:0008289	MF	lipid binding	21/293	1215/38701	0.000513124	0.0192342
24	GO:0022603	BP	regulation of anatomical structure morphogenesis	24/293	1465/38701	0.000514454	0.0192524
3	GO:2000547	BP	regulation of dendritic cell dendrite assembly	3/293	21/38701	0.000516341	0.0192598
3	GO:0050664	MF	oxidoreductase activity, acting on NAD(P)H, oxygen as acceptor	3/293	21/38701	0.000516341	0.0192598
9	GO:0120032	BP	regulation of plasma membrane bounded cell projection assembly	9/293	301/38701	0.000524242	0.0195227
7	GO:0120034	BP	positive regulation of plasma membrane bounded cell projection assembly	7/293	184/38701	0.000535978	0.0198948
7	GO:0017124	MF	SH3 domain binding	7/293	184/38701	0.000535978	0.0198948
6	GO:0002718	BP	regulation of cytokine production involved in immune response	6/293	133/38701	0.000549082	0.020337
9	GO:0060491	BP	regulation of cell projection assembly	9/293	303/38701	0.000549672	0.020337
36	GO:0042325	BP	regulation of phosphorylation	36/293	2593/38701	0.000562183	0.0205178
2	GO:0002678	BP	positive regulation of chronic inflammatory response	2/293	5/38701	0.000562696	0.0205178
2	GO:0002277	BP	myeloid dendritic cell activation involved in immune response	2/293	5/38701	0.000562696	0.0205178
2	GO:0002339	BP	B cell selection	2/293	5/38701	0.000562696	0.0205178
2	GO:0045345	BP	positive regulation of MHC class I biosynthetic process	2/293	5/38701	0.000562696	0.0205178
2	GO:0051665	BP	membrane raft localization	2/293	5/38701	0.000562696	0.0205178
2	GO:0030886	BP	negative regulation of myeloid dendritic cell activation	2/293	5/38701	0.000562696	0.0205178
2	GO:0034124	BP	regulation of MyD88-dependent toll-like receptor signaling pathway	2/293	5/38701	0.000562696	0.0205178
4	GO:0001961	BP	positive regulation of cytokine-mediated signaling pathway	4/293	50/38701	0.000563547	0.0205178
4	GO:0009648	BP	photoperiodism	4/293	50/38701	0.000563547	0.0205178
44	GO:0038023	MF	signaling receptor activity	44/293	3416/38701	0.00056607	0.0205768
61	GO:0051246	BP	regulation of protein metabolic process	61/293	5250/38701	0.000572522	0.0207783
16	GO:0051493	BP	regulation of cytoskeleton organization	16/293	819/38701	0.000576961	0.0209061
5	GO:0050663	BP	cytokine secretion	5/293	89/38701	0.000593804	0.0212393
6	GO:0014066	BP	regulation of phosphatidylinositol 3-kinase signaling	6/293	135/38701	0.00059405	0.0212393
3	GO:0009435	BP	NAD biosynthetic process	3/293	22/38701	0.00059453	0.0212393
3	GO:0042402	BP	cellular biogenic amine catabolic process	3/293	22/38701	0.00059453	0.0212393
3	GO:0009310	BP	amine catabolic process	3/293	22/38701	0.00059453	0.0212393
3	GO:0002883	BP	regulation of hypersensitivity	3/293	22/38701	0.00059453	0.0212393
3	GO:0042754	BP	negative regulation of circadian rhythm	3/293	22/38701	0.00059453	0.0212393
3	GO:0043369	BP	CD4-positive or CD8-positive, alpha-beta T cell lineage commitment	3/293	22/38701	0.00059453	0.0212393
3	GO:0002710	BP	negative regulation of T cell mediated immunity	3/293	22/38701	0.00059453	0.0212393
14	GO:0098609	BP	cell-cell adhesion	14/293	663/38701	0.000598485	0.0213472
13	GO:0030029	BP	actin filament-based process	13/293	587/38701	0.00060237	0.0214523
4	GO:0072524	BP	pyridine-containing compound metabolic process	4/293	51/38701	0.000607895	0.0216091
18	GO:0031400	BP	negative regulation of protein modification process	18/293	989/38701	0.000608666	0.0216091
20	GO:0000981	MF	DNA-binding transcription factor activity, RNA polymerase II-specific	20/293	1137/38701	0.000626211	0.0221974
6	GO:0043506	BP	regulation of JUN kinase activity	6/293	137/38701	0.000641824	0.0226454
4	GO:0007257	BP	activation of JUN kinase activity	4/293	52/38701	0.000654662	0.0230272
4	GO:0045622	BP	regulation of T-helper cell differentiation	4/293	52/38701	0.000654662	0.0230272
11	GO:0005125	MF	cytokine activity	11/293	447/38701	0.000670259	0.0235395
9	GO:0002274	BP	myeloid leukocyte activation	9/293	312/38701	0.00067695	0.0236956
3	GO:0009074	BP	aromatic amino acid family catabolic process	3/293	23/38701	0.000679893	0.0236956
3	GO:0045625	BP	regulation of T-helper 1 cell differentiation	3/293	23/38701	0.000679893	0.0236956
3	GO:2000846	BP	regulation of corticosteroid hormone secretion	3/293	23/38701	0.000679893	0.0236956
21	GO:0044433	CC	cytoplasmic vesicle part	21/293	1249/38701	0.000675873	0.0236956
8	GO:0043409	BP	negative regulation of MAPK cascade	8/293	250/38701	0.000685065	0.0238394
7	GO:1903038	BP	negative regulation of leukocyte cell-cell adhesion	7/293	192/38701	0.000689414	0.0239178
7	GO:0098562	CC	cytoplasmic side of membrane	7/293	192/38701	0.000689414	0.0239178
38	GO:0019220	BP	regulation of phosphate metabolic process	38/293	2864/38701	0.000702853	0.0243471
38	GO:0051174	BP	regulation of phosphorus metabolic process	38/293	2865/38701	0.000705551	0.0244035
5	GO:2000404	BP	regulation of T cell migration	5/293	93/38701	0.00072548	0.025047
12	GO:0030036	BP	actin cytoskeleton organization	12/293	524/38701	0.00072635	0.025047
9	GO:0032760	BP	positive regulation of tumor necrosis factor production	9/293	316/38701	0.000740763	0.0255055
6	GO:1904894	BP	positive regulation of receptor signaling pathway via STAT	6/293	141/38701	0.000746268	0.0256177
6	GO:0000018	BP	regulation of DNA recombination	6/293	141/38701	0.000746268	0.0256177
4	GO:0009072	BP	aromatic amino acid family metabolic process	4/293	54/38701	0.000755746	0.0259041
3	GO:0072678	BP	T cell migration	3/293	24/38701	0.000772685	0.026366
3	GO:0002363	BP	alpha-beta T cell lineage commitment	3/293	24/38701	0.000772685	0.026366
3	GO:0002313	BP	mature B cell differentiation involved in immune response	3/293	24/38701	0.000772685	0.026366
9	GO:1903557	BP	positive regulation of tumor necrosis factor superfamily cytokine production	9/293	318/38701	0.000774462	0.0263872
13	GO:0030659	CC	cytoplasmic vesicle membrane	13/293	606/38701	0.000806521	0.0273977
14	GO:0005543	MF	phospholipid binding	14/293	685/38701	0.000819714	0.0278045
7	GO:0002698	BP	negative regulation of immune effector process	7/293	198/38701	0.000825827	0.0278654
2	GO:2000520	BP	regulation of immunological synapse formation	2/293	6/38701	0.00083982	0.0278654
2	GO:0002513	BP	tolerance induction to self antigen	2/293	6/38701	0.00083982	0.0278654
2	GO:0002636	BP	positive regulation of germinal center formation	2/293	6/38701	0.00083982	0.0278654
2	GO:0002322	BP	B cell proliferation involved in immune response	2/293	6/38701	0.00083982	0.0278654
2	GO:0002586	BP	regulation of antigen processing and presentation of peptide antigen via MHC class II	2/293	6/38701	0.00083982	0.0278654
2	GO:1905333	BP	regulation of gastric motility	2/293	6/38701	0.00083982	0.0278654
2	GO:0051464	BP	positive regulation of cortisol secretion	2/293	6/38701	0.00083982	0.0278654
2	GO:0032831	BP	positive regulation of CD4-positive, CD25-positive, alpha-beta regulatory T cell differentiation	2/293	6/38701	0.00083982	0.0278654
2	GO:0070949	BP	regulation of neutrophil mediated killing of symbiont cell	2/293	6/38701	0.00083982	0.0278654
29	GO:0098796	CC	membrane protein complex	29/293	2006/38701	0.000830547	0.0278654
5	GO:0009898	CC	cytoplasmic side of plasma membrane	5/293	96/38701	0.000837701	0.0278654
2	GO:0043120	MF	tumor necrosis factor binding	2/293	6/38701	0.00083982	0.0278654
2	GO:0008142	MF	oxysterol binding	2/293	6/38701	0.00083982	0.0278654
2	GO:0019976	MF	interleukin-2 binding	2/293	6/38701	0.00083982	0.0278654
4	GO:0045911	BP	positive regulation of DNA recombination	4/293	56/38701	0.000867382	0.0286965
4	GO:0002675	BP	positive regulation of acute inflammatory response	4/293	56/38701	0.000867382	0.0286965
3	GO:0045579	BP	positive regulation of B cell differentiation	3/293	25/38701	0.000873153	0.0287624
3	GO:0051023	BP	regulation of immunoglobulin secretion	3/293	25/38701	0.000873153	0.0287624
3	GO:0038187	MF	pattern recognition receptor activity	3/293	25/38701	0.000873153	0.0287624
7	GO:0008360	BP	regulation of cell shape	7/293	201/38701	0.000901585	0.0296562
9	GO:0098791	CC	Golgi subcompartment	9/293	326/38701	0.000921987	0.0302401
4	GO:0033628	BP	regulation of cell adhesion mediated by integrin	4/293	57/38701	0.00092734	0.0303721
7	GO:0030139	CC	endocytic vesicle	7/293	203/38701	0.00095506	0.0312351
5	GO:0051279	BP	regulation of release of sequestered calcium ion into cytosol	5/293	99/38701	0.000962372	0.0314292
3	GO:0002438	BP	acute inflammatory response to antigenic stimulus	3/293	26/38701	0.000981539	0.0317824
3	GO:0019359	BP	nicotinamide nucleotide biosynthetic process	3/293	26/38701	0.000981539	0.0317824
3	GO:0002606	BP	positive regulation of dendritic cell antigen processing and presentation	3/293	26/38701	0.000981539	0.0317824
3	GO:0051770	BP	positive regulation of nitric-oxide synthase biosynthetic process	3/293	26/38701	0.000981539	0.0317824
13	GO:0000323	CC	lytic vacuole	13/293	619/38701	0.000977412	0.0317824
13	GO:0005764	CC	lysosome	13/293	619/38701	0.000977412	0.0317824
5	GO:0007266	BP	Rho protein signal transduction	5/293	100/38701	0.00100684	0.0325094
5	GO:0014068	BP	positive regulation of phosphatidylinositol 3-kinase signaling	5/293	100/38701	0.00100684	0.0325094
44	GO:0060089	MF	molecular transducer activity	44/293	3528/38701	0.00101609	0.0327618
8	GO:0022408	BP	negative regulation of cell-cell adhesion	8/293	266/38701	0.00102195	0.0329043
40	GO:0043067	BP	regulation of programmed cell death	40/293	3089/38701	0.00103218	0.0331867
16	GO:0043410	BP	positive regulation of MAPK cascade	16/293	866/38701	0.00103613	0.0332669
9	GO:1903531	BP	negative regulation of secretion by cell	9/293	332/38701	0.00104698	0.0335679
4	GO:0002456	BP	T cell mediated immunity	4/293	59/38701	0.0010559	0.0338067
28	GO:0031226	CC	intrinsic component of plasma membrane	28/293	1935/38701	0.00106171	0.033945
42	GO:0010941	BP	regulation of cell death	42/293	3325/38701	0.00106634	0.0340454
3	GO:0001779	BP	natural killer cell differentiation	3/293	27/38701	0.00109808	0.0349154
3	GO:0019363	BP	pyridine nucleotide biosynthetic process	3/293	27/38701	0.00109808	0.0349154
7	GO:0046887	BP	positive regulation of hormone secretion	7/293	208/38701	0.00109971	0.0349154
20	GO:0045859	BP	regulation of protein kinase activity	20/293	1211/38701	0.0011059	0.0350632
11	GO:1901342	BP	regulation of vasculature development	11/293	476/38701	0.00111371	0.0352618
16	GO:0071396	BP	cellular response to lipid	16/293	873/38701	0.00112579	0.0355948
2	GO:0046874	BP	quinolinate metabolic process	2/293	7/38701	0.00116987	0.0363839
2	GO:0048293	BP	regulation of isotype switching to IgE isotypes	2/293	7/38701	0.00116987	0.0363839
2	GO:0045343	BP	regulation of MHC class I biosynthetic process	2/293	7/38701	0.00116987	0.0363839
2	GO:0032829	BP	regulation of CD4-positive, CD25-positive, alpha-beta regulatory T cell differentiation	2/293	7/38701	0.00116987	0.0363839
2	GO:0002580	BP	regulation of antigen processing and presentation of peptide or polysaccharide antigen via MHC class II	2/293	7/38701	0.00116987	0.0363839
2	GO:0071706	BP	tumor necrosis factor superfamily cytokine production	2/293	7/38701	0.00116987	0.0363839
2	GO:0045409	BP	negative regulation of interleukin-6 biosynthetic process	2/293	7/38701	0.00116987	0.0363839
2	GO:0002578	BP	negative regulation of antigen processing and presentation	2/293	7/38701	0.00116987	0.0363839
2	GO:0051462	BP	regulation of cortisol secretion	2/293	7/38701	0.00116987	0.0363839
2	GO:0032640	BP	tumor necrosis factor production	2/293	7/38701	0.00116987	0.0363839
2	GO:0008091	CC	spectrin	2/293	7/38701	0.00116987	0.0363839
47	GO:0051128	BP	regulation of cellular component organization	47/293	3876/38701	0.00118175	0.0367034
10	GO:0007162	BP	negative regulation of cell adhesion	10/293	408/38701	0.00120023	0.0372267
11	GO:0040013	BP	negative regulation of locomotion	11/293	481/38701	0.00121035	0.0374897
30	GO:0051248	BP	negative regulation of protein metabolic process	30/293	2149/38701	0.00122015	0.0377277
3	GO:0031579	BP	membrane raft organization	3/293	28/38701	0.00122299	0.0377277
3	GO:0002643	BP	regulation of tolerance induction	3/293	28/38701	0.00122299	0.0377277
7	GO:0051092	BP	positive regulation of NF-kappaB transcription factor activity	7/293	212/38701	0.00122737	0.0378116
8	GO:0030833	BP	regulation of actin filament polymerization	8/293	275/38701	0.00126294	0.0388549
9	GO:0090276	BP	regulation of peptide hormone secretion	9/293	342/38701	0.00128555	0.0394973
7	GO:0050728	BP	negative regulation of inflammatory response	7/293	215/38701	0.00133051	0.0408237
6	GO:0090277	BP	positive regulation of peptide hormone secretion	6/293	158/38701	0.0013439	0.0411242
3	GO:0010310	BP	regulation of hydrogen peroxide metabolic process	3/293	29/38701	0.00135651	0.0411788
3	GO:0002604	BP	regulation of dendritic cell antigen processing and presentation	3/293	29/38701	0.00135651	0.0411788
3	GO:2000402	BP	negative regulation of lymphocyte migration	3/293	29/38701	0.00135651	0.0411788
3	GO:2000831	BP	regulation of steroid hormone secretion	3/293	29/38701	0.00135651	0.0411788
3	GO:0002864	BP	regulation of acute inflammatory response to antigenic stimulus	3/293	29/38701	0.00135651	0.0411788
3	GO:0034706	CC	sodium channel complex	3/293	29/38701	0.00135651	0.0411788
15	GO:0008047	MF	enzyme activator activity	15/293	807/38701	0.00139098	0.0421689
8	GO:0021700	BP	developmental maturation	8/293	280/38701	0.00141517	0.0428063
5	GO:0002474	BP	antigen processing and presentation of peptide antigen via MHC class I	5/293	108/38701	0.0014195	0.0428063
5	GO:0030101	BP	natural killer cell activation	5/293	108/38701	0.0014195	0.0428063
5	GO:0060402	BP	calcium ion transport into cytosol	5/293	108/38701	0.0014195	0.0428063
27	GO:0003690	MF	double-stranded DNA binding	27/293	1873/38701	0.00142666	0.0429653
4	GO:0060760	BP	positive regulation of response to cytokine stimulus	4/293	64/38701	0.00143116	0.0430442
14	GO:0043254	BP	regulation of protein complex assembly	14/293	727/38701	0.00143601	0.0431333
18	GO:0061024	BP	membrane organization	18/293	1044/38701	0.00144375	0.0432552
39	GO:0042981	BP	regulation of apoptotic process	39/293	3055/38701	0.00144386	0.0432552
6	GO:0001959	BP	regulation of cytokine-mediated signaling pathway	6/293	161/38701	0.00147917	0.0442548
9	GO:0032872	BP	regulation of stress-activated MAPK cascade	9/293	351/38701	0.00153607	0.045834
2	GO:0002666	BP	positive regulation of T cell tolerance induction	2/293	8/38701	0.00155203	0.045834
2	GO:1904306	BP	positive regulation of gastro-intestinal system smooth muscle contraction	2/293	8/38701	0.00155203	0.045834
2	GO:2000851	BP	positive regulation of glucocorticoid secretion	2/293	8/38701	0.00155203	0.045834
2	GO:0050859	BP	negative regulation of B cell receptor signaling pathway	2/293	8/38701	0.00155203	0.045834
2	GO:0050861	BP	positive regulation of B cell receptor signaling pathway	2/293	8/38701	0.00155203	0.045834
2	GO:0033092	BP	positive regulation of immature T cell proliferation in thymus	2/293	8/38701	0.00155203	0.045834
2	GO:0051025	BP	negative regulation of immunoglobulin secretion	2/293	8/38701	0.00155203	0.045834
5	GO:0045335	CC	phagocytic vesicle	5/293	110/38701	0.00153966	0.045834
2	GO:0015280	MF	ligand-gated sodium channel activity	2/293	8/38701	0.00155203	0.045834
12	GO:0070372	BP	regulation of ERK1 and ERK2 cascade	12/293	576/38701	0.00162062	0.0476328
10	GO:0045765	BP	regulation of angiogenesis	10/293	425/38701	0.00162243	0.0476328
3	GO:0072525	BP	pyridine-containing compound biosynthetic process	3/293	31/38701	0.0016502	0.0483578
9	GO:0070302	BP	regulation of stress-activated protein kinase signaling cascade	9/293	355/38701	0.00165932	0.0485627
4	GO:0044060	BP	regulation of endocrine process	4/293	67/38701	0.00169615	0.0495772

## Sheet: Table S7
Table S7. Enriched GO terms in colitis mice upon pasteurised Akk treatment
Number	GO ID	Term Type	Description	Ratio_in_study	Ratio_in_pop	Pvalue	Padjust
14	GO:0002440	BP	production of molecular mediator of immune response	14/122	220/38701	6.31288e-12	5.96519e-08
17	GO:0030198	BP	extracellular matrix organization	17/122	297/38701	1.28173e-11	5.96519e-08
10	GO:0005518	MF	collagen binding	10/122	83/38701	6.15353e-12	5.96519e-08
17	GO:0005201	MF	extracellular matrix structural constituent	17/122	128/38701	1.1042e-11	5.96519e-08
16	GO:0005539	MF	glycosaminoglycan binding	16/122	368/38701	1.30655e-11	5.96519e-08
14	GO:0002377	BP	immunoglobulin production	14/122	189/38701	2.46291e-11	6.61504e-08
26	GO:0022610	BP	biological adhesion	26/122	1321/38701	2.46363e-11	6.61504e-08
35	GO:2000026	BP	regulation of multicellular organismal development	35/122	3018/38701	3.4507e-11	6.61504e-08
9	GO:0005581	CC	collagen trimer	9/122	99/38701	3.1071e-11	6.61504e-08
81	GO:0044421	CC	extracellular region part	81/122	3916/38701	3.26771e-11	6.61504e-08
41	GO:0031012	CC	extracellular matrix	41/122	660/38701	3.47733e-11	6.61504e-08
14	GO:0008201	MF	heparin binding	14/122	305/38701	1.7857e-11	6.61504e-08
55	GO:0005576	CC	extracellular region	55/122	2393/38701	5.11071e-11	8.75984e-08
11	GO:0005604	CC	basement membrane	11/122	150/38701	5.37225e-11	8.75984e-08
63	GO:0005615	CC	extracellular space	63/122	2588/38701	7.04388e-11	1.07198e-07
28	GO:0006955	BP	immune response	28/122	2119/38701	7.80141e-11	1.11307e-07
17	GO:0043062	BP	extracellular structure organization	17/122	347/38701	8.83208e-11	1.18599e-07
34	GO:0062023	CC	collagen-containing extracellular matrix	34/122	514/38701	9.66097e-11	1.22523e-07
26	GO:0007155	BP	cell adhesion	26/122	1289/38701	1.03318e-10	1.24133e-07
34	GO:0007166	BP	cell surface receptor signaling pathway	34/122	2639/38701	1.14403e-10	1.30579e-07
30	GO:0048513	BP	animal organ development	30/122	2546/38701	2.28508e-10	2.48399e-07
19	GO:0009888	BP	tissue development	19/122	984/38701	2.94584e-10	3.0483e-07
14	GO:1901681	MF	sulfur compound binding	14/122	468/38701	3.07127e-10	3.0483e-07
31	GO:0005102	MF	signaling receptor binding	31/122	2771/38701	3.80311e-10	3.61739e-07
31	GO:0045595	BP	regulation of cell differentiation	31/122	2844/38701	7.16167e-10	6.53947e-07
67	GO:0050896	BP	response to stimulus	67/122	10903/38701	8.12095e-10	7.13019e-07
37	GO:0050793	BP	regulation of developmental process	37/122	3989/38701	9.29624e-10	7.8598e-07
10	GO:0019814	CC	immunoglobulin complex	10/122	209/38701	1.38468e-09	1.12891e-06
16	GO:0009887	BP	animal organ morphogenesis	16/122	734/38701	1.52255e-09	1.19851e-06
48	GO:0048856	BP	anatomical structure development	48/122	6378/38701	1.61799e-09	1.21588e-06
42	GO:0051239	BP	regulation of multicellular organismal process	42/122	5097/38701	1.65114e-09	1.21588e-06
5	GO:0005614	CC	interstitial matrix	5/122	17/38701	1.72053e-09	1.22738e-06
47	GO:0048583	BP	regulation of response to stimulus	47/122	6145/38701	1.95589e-09	1.353e-06
83	GO:0005515	MF	protein binding	83/122	15904/38701	2.6419e-09	1.72312e-06
26	GO:0009653	BP	anatomical structure morphogenesis	26/122	2153/38701	2.79915e-09	1.77497e-06
21	GO:0051270	BP	regulation of cellular component movement	21/122	1473/38701	7.02235e-09	4.21858e-06
13	GO:0048729	BP	tissue morphogenesis	13/122	529/38701	1.42257e-08	8.3268e-06
11	GO:0090287	BP	regulation of cellular response to growth factor stimulus	11/122	360/38701	2.16618e-08	1.21866e-05
5	GO:2000050	BP	regulation of non-canonical Wnt signaling pathway	5/122	27/38701	2.18877e-08	1.21866e-05
57	GO:0032502	BP	developmental process	57/122	9181/38701	2.63705e-08	1.4333e-05
20	GO:0060284	BP	regulation of cell development	20/122	1504/38701	5.25124e-08	2.7878e-05
14	GO:0001101	BP	response to acid chemical	14/122	710/38701	5.95332e-08	3.08869e-05
7	GO:0030510	BP	regulation of BMP signaling pathway	7/122	111/38701	6.73132e-08	3.41472e-05
7	GO:0051216	BP	cartilage development	7/122	114/38701	8.09165e-08	3.93013e-05
18	GO:0030334	BP	regulation of cell migration	18/122	1281/38701	1.17021e-07	5.56531e-05
4	GO:2000095	BP	regulation of Wnt signaling pathway, planar cell polarity pathway	4/122	16/38701	1.66112e-07	7.2923e-05
31	GO:0048584	BP	positive regulation of response to stimulus	31/122	3650/38701	2.34647e-07	9.91948e-05
30	GO:0002376	BP	immune system process	30/122	3463/38701	2.54104e-07	0.000103643
18	GO:2000145	BP	regulation of cell motility	18/122	1358/38701	2.75714e-07	0.000104009
4	GO:0090171	BP	chondrocyte morphogenesis	4/122	18/38701	2.77927e-07	0.000104009
4	GO:0003414	BP	chondrocyte morphogenesis involved in endochondral bone morphogenesis	4/122	18/38701	2.77927e-07	0.000104009
4	GO:0003429	BP	growth plate cartilage chondrocyte morphogenesis	4/122	18/38701	2.77927e-07	0.000104009
4	GO:0003422	BP	growth plate cartilage morphogenesis	4/122	18/38701	2.77927e-07	0.000104009
31	GO:0009605	BP	response to external stimulus	31/122	3697/38701	3.11008e-07	0.000114511
8	GO:0070542	BP	response to fatty acid	8/122	206/38701	3.22131e-07	0.000116724
9	GO:0019838	MF	growth factor binding	9/122	290/38701	3.83076e-07	0.000134536
8	GO:0010811	BP	positive regulation of cell-substrate adhesion	8/122	213/38701	4.15112e-07	0.000137336
8	GO:0006958	BP	complement activation, classical pathway	8/122	213/38701	4.15112e-07	0.000137336
8	GO:0000904	BP	cell morphogenesis involved in differentiation	8/122	217/38701	4.77903e-07	0.000155851
5	GO:0001657	BP	ureteric bud development	5/122	49/38701	4.89131e-07	0.000157266
19	GO:0045597	BP	positive regulation of cell differentiation	19/122	1592/38701	6.09341e-07	0.000193195
18	GO:0040012	BP	regulation of locomotion	18/122	1455/38701	7.46875e-07	0.000233557
20	GO:0051241	BP	negative regulation of multicellular organismal process	20/122	1786/38701	8.03009e-07	0.000247416
8	GO:0006956	BP	complement activation	8/122	233/38701	8.17087e-07	0.000247416
18	GO:0022603	BP	regulation of anatomical structure morphogenesis	18/122	1465/38701	8.23709e-07	0.000247416
6	GO:0071560	BP	cellular response to transforming growth factor beta stimulus	6/122	101/38701	8.60358e-07	0.000254295
9	GO:0090092	BP	regulation of transmembrane receptor protein serine/threonine kinase signaling pathway	9/122	320/38701	8.68889e-07	0.000254295
9	GO:0010810	BP	regulation of cell-substrate adhesion	9/122	321/38701	8.91607e-07	0.000257641
5	GO:0030199	BP	collagen fibril organization	5/122	56/38701	9.62703e-07	0.000270319
22	GO:0051094	BP	positive regulation of developmental process	22/122	2153/38701	9.71009e-07	0.000270319
13	GO:0007167	BP	enzyme linked receptor protein signaling pathway	13/122	767/38701	9.96149e-07	0.000273977
5	GO:0072164	BP	mesonephric tubule development	5/122	57/38701	1.05262e-06	0.000282696
7	GO:0042571	CC	immunoglobulin complex, circulating	7/122	166/38701	1.04161e-06	0.000282696
5	GO:0072163	BP	mesonephric epithelium development	5/122	58/38701	1.14903e-06	0.000301494
7	GO:0005178	MF	integrin binding	7/122	172/38701	1.32084e-06	0.000338789
7	GO:0045995	BP	regulation of embryonic development	7/122	173/38701	1.37297e-06	0.000341444
7	GO:0034987	MF	immunoglobulin receptor binding	7/122	173/38701	1.37297e-06	0.000341444
5	GO:0032330	BP	regulation of chondrocyte differentiation	5/122	61/38701	1.48061e-06	0.000363434
4	GO:0060536	BP	cartilage morphogenesis	4/122	27/38701	1.55939e-06	0.000374712
5	GO:0030514	BP	negative regulation of BMP signaling pathway	5/122	62/38701	1.60644e-06	0.000381999
6	GO:0071559	BP	response to transforming growth factor beta	6/122	113/38701	1.66323e-06	0.000391424
3	GO:2000051	BP	negative regulation of non-canonical Wnt signaling pathway	3/122	8/38701	1.69188e-06	0.000394104
7	GO:0090288	BP	negative regulation of cellular response to growth factor stimulus	7/122	180/38701	1.78838e-06	0.000412376
7	GO:0006910	BP	phagocytosis, recognition	7/122	182/38701	1.92473e-06	0.000435027
13	GO:0048018	MF	receptor ligand activity	13/122	817/38701	1.99683e-06	0.000446899
5	GO:0044420	CC	extracellular matrix component	5/122	65/38701	2.03512e-06	0.000451047
14	GO:0048731	BP	system development	14/122	957/38701	2.09947e-06	0.000460834
13	GO:0030546	MF	signaling receptor activator activity	13/122	822/38701	2.1346e-06	0.000464082
19	GO:0009968	BP	negative regulation of signal transduction	19/122	1736/38701	2.19015e-06	0.000471668
7	GO:0001503	BP	ossification	7/122	186/38701	2.2236e-06	0.000474396
20	GO:0010648	BP	negative regulation of cell communication	20/122	1922/38701	2.46657e-06	0.000521359
20	GO:0023057	BP	negative regulation of signaling	20/122	1926/38701	2.54522e-06	0.000533049
10	GO:0050839	MF	cell adhesion molecule binding	10/122	473/38701	2.75267e-06	0.000567415
15	GO:0005509	MF	calcium ion binding	15/122	1125/38701	2.75903e-06	0.000567415
57	GO:0048518	BP	positive regulation of biological process	57/122	10390/38701	2.80896e-06	0.000572526
47	GO:0007165	BP	signal transduction	47/122	7790/38701	3.73451e-06	0.000741317
12	GO:0009897	CC	external side of plasma membrane	12/122	731/38701	3.68442e-06	0.000741317
13	GO:0030545	MF	receptor regulator activity	13/122	865/38701	3.71537e-06	0.000741317
7	GO:0050853	BP	B cell receptor signaling pathway	7/122	204/38701	4.09285e-06	0.000805444
15	GO:0045596	BP	negative regulation of cell differentiation	15/122	1167/38701	4.29536e-06	0.000825074
35	GO:0023051	BP	regulation of signaling	35/122	5026/38701	4.30102e-06	0.000825074
15	GO:0043408	BP	regulation of MAPK cascade	15/122	1173/38701	4.56825e-06	0.000869033
32	GO:0044459	CC	plasma membrane part	32/122	4396/38701	4.61072e-06	0.000869865
43	GO:0032501	BP	multicellular organismal process	43/122	6960/38701	4.8423e-06	0.000906065
14	GO:0030155	BP	regulation of cell adhesion	14/122	1034/38701	5.10041e-06	0.000946603
21	GO:0009719	BP	response to endogenous stimulus	21/122	2211/38701	5.55116e-06	0.00102195
7	GO:0006911	BP	phagocytosis, engulfment	7/122	215/38701	5.77607e-06	0.00105485
24	GO:1901700	BP	response to oxygen-containing compound	24/122	2793/38701	5.96081e-06	0.00107995
5	GO:0072073	BP	kidney epithelium development	5/122	82/38701	6.44148e-06	0.00113989
5	GO:0061035	BP	regulation of cartilage development	5/122	82/38701	6.44148e-06	0.00113989
6	GO:0007417	BP	central nervous system development	6/122	143/38701	6.5098e-06	0.00114312
10	GO:0048638	BP	regulation of developmental growth	10/122	524/38701	6.76382e-06	0.00117866
7	GO:0007178	BP	transmembrane receptor protein serine/threonine kinase signaling pathway	7/122	221/38701	6.91399e-06	0.0011957
9	GO:0002009	BP	morphogenesis of an epithelium	9/122	414/38701	7.0739e-06	0.00121416
6	GO:0090101	BP	negative regulation of transmembrane receptor protein serine/threonine kinase signaling pathway	6/122	147/38701	7.62568e-06	0.00128947
6	GO:1905330	BP	regulation of morphogenesis of an epithelium	6/122	148/38701	7.92756e-06	0.00133066
13	GO:0009617	BP	response to bacterium	13/122	932/38701	8.26542e-06	0.00137725
8	GO:0009612	BP	response to mechanical stimulus	8/122	320/38701	8.51756e-06	0.00140898
7	GO:0099024	BP	plasma membrane invagination	7/122	231/38701	9.22213e-06	0.00151455
17	GO:0051093	BP	negative regulation of developmental process	17/122	1574/38701	9.43671e-06	0.00153856
8	GO:0035295	BP	tube development	8/122	325/38701	9.53024e-06	0.00153856
34	GO:0010646	BP	regulation of cell communication	34/122	5004/38701	9.57049e-06	0.00153856
4	GO:0017147	MF	Wnt-protein binding	4/122	43/38701	1.05462e-05	0.00168356
7	GO:0010324	BP	membrane invagination	7/122	238/38701	1.11916e-05	0.00176953
14	GO:0009986	CC	cell surface	14/122	1110/38701	1.13356e-05	0.0017724
6	GO:0090263	BP	positive regulation of canonical Wnt signaling pathway	6/122	158/38701	1.15146e-05	0.00178812
15	GO:0016477	BP	cell migration	15/122	1284/38701	1.33409e-05	0.00204932
21	GO:0048585	BP	negative regulation of response to stimulus	21/122	2343/38701	1.33845e-05	0.00204932
17	GO:0009725	BP	response to hormone	17/122	1618/38701	1.34658e-05	0.00204932
8	GO:0000902	BP	cell morphogenesis	8/122	346/38701	1.49669e-05	0.00225019
7	GO:0060429	BP	epithelium development	7/122	249/38701	1.49828e-05	0.00225019
8	GO:0050864	BP	regulation of B cell activation	8/122	349/38701	1.59233e-05	0.00237579
11	GO:0050867	BP	positive regulation of cell activation	11/122	710/38701	1.63108e-05	0.00241782
8	GO:0016055	BP	Wnt signaling pathway	8/122	351/38701	1.65889e-05	0.00244318
6	GO:0045638	BP	negative regulation of myeloid cell differentiation	6/122	169/38701	1.68711e-05	0.00246881
10	GO:0048598	BP	embryonic morphogenesis	10/122	588/38701	1.82629e-05	0.00265545
9	GO:0051271	BP	negative regulation of cellular component movement	9/122	468/38701	1.86949e-05	0.00270106
10	GO:0051251	BP	positive regulation of lymphocyte activation	10/122	593/38701	1.96295e-05	0.00281826
13	GO:0045664	BP	regulation of neuron differentiation	13/122	1017/38701	2.0685e-05	0.00295124
8	GO:0035239	BP	tube morphogenesis	8/122	363/38701	2.10946e-05	0.00299097
7	GO:0001822	BP	kidney development	7/122	265/38701	2.23446e-05	0.00314866
4	GO:0034695	BP	response to prostaglandin E	4/122	52/38701	2.2634e-05	0.00316988
5	GO:0007179	BP	transforming growth factor beta receptor signaling pathway	5/122	107/38701	2.357e-05	0.00327992
8	GO:1905114	BP	cell surface receptor signaling pathway involved in cell-cell signaling	8/122	369/38701	2.37071e-05	0.00327992
7	GO:0003823	MF	antigen binding	7/122	270/38701	2.51781e-05	0.00342122
22	GO:0042127	BP	regulation of cell population proliferation	22/122	2648/38701	2.6108e-05	0.00346508
7	GO:0046328	BP	regulation of JNK cascade	7/122	272/38701	2.63914e-05	0.00348244
8	GO:0008037	BP	cell recognition	8/122	377/38701	2.76083e-05	0.00362208
7	GO:0050871	BP	positive regulation of B cell activation	7/122	276/38701	2.89627e-05	0.00377807
2	GO:2000040	BP	regulation of planar cell polarity pathway involved in axis elongation	2/122	3/38701	2.95076e-05	0.00379441
2	GO:2000041	BP	negative regulation of planar cell polarity pathway involved in axis elongation	2/122	3/38701	2.95076e-05	0.00379441
9	GO:0007389	BP	pattern specification process	9/122	498/38701	3.03686e-05	0.00383536
4	GO:0072089	BP	stem cell proliferation	4/122	56/38701	3.04101e-05	0.00383536
4	GO:0010470	BP	regulation of gastrulation	4/122	56/38701	3.04101e-05	0.00383536
6	GO:0001501	BP	skeletal system development	6/122	192/38701	3.45778e-05	0.00431334
6	GO:0061138	BP	morphogenesis of a branching epithelium	6/122	193/38701	3.55961e-05	0.00441624
6	GO:0090090	BP	negative regulation of canonical Wnt signaling pathway	6/122	195/38701	3.7705e-05	0.004636
11	GO:0044057	BP	regulation of system process	11/122	779/38701	3.79767e-05	0.004636
12	GO:0098552	CC	side of membrane	12/122	925/38701	3.79287e-05	0.004636
20	GO:0001932	BP	regulation of protein phosphorylation	20/122	2320/38701	3.83355e-05	0.00463705
10	GO:0045785	BP	positive regulation of cell adhesion	10/122	642/38701	3.83916e-05	0.00463705
6	GO:0030177	BP	positive regulation of Wnt signaling pathway	6/122	196/38701	3.87964e-05	0.00466128
5	GO:0007160	BP	cell-matrix adhesion	5/122	121/38701	4.2554e-05	0.00505949
30	GO:0009966	BP	regulation of signal transduction	30/122	4436/38701	4.38763e-05	0.00518968
16	GO:0040011	BP	locomotion	16/122	1605/38701	4.63311e-05	0.00545178
7	GO:0030278	BP	regulation of ossification	7/122	298/38701	4.70695e-05	0.00551027
4	GO:0046329	BP	negative regulation of JNK cascade	4/122	63/38701	4.84863e-05	0.00564716
11	GO:0010975	BP	regulation of neuron projection development	11/122	802/38701	4.93249e-05	0.00571568
18	GO:0009628	BP	response to abiotic stimulus	18/122	1982/38701	5.04183e-05	0.00578366
4	GO:0034694	BP	response to prostaglandin	4/122	64/38701	5.15931e-05	0.00588884
6	GO:0001763	BP	morphogenesis of a branching structure	6/122	207/38701	5.25614e-05	0.00596951
7	GO:0031589	BP	cell-substrate adhesion	7/122	305/38701	5.44718e-05	0.00615586
8	GO:0031099	BP	regeneration	8/122	418/38701	5.70778e-05	0.00641859
2	GO:0046546	BP	development of primary male sexual characteristics	2/122	4/38701	5.88933e-05	0.00646193
2	GO:0090244	BP	Wnt signaling pathway involved in somitogenesis	2/122	4/38701	5.88933e-05	0.00646193
2	GO:0072180	BP	mesonephric duct morphogenesis	2/122	4/38701	5.88933e-05	0.00646193
3	GO:2000669	BP	negative regulation of dendritic cell apoptotic process	3/122	24/38701	5.89351e-05	0.00646193
21	GO:0042325	BP	regulation of phosphorylation	21/122	2593/38701	5.91617e-05	0.00646193
5	GO:0019199	MF	transmembrane receptor protein kinase activity	5/122	131/38701	6.21284e-05	0.00665853
11	GO:2000147	BP	positive regulation of cell motility	11/122	824/38701	6.2799e-05	0.00669895
15	GO:0048870	BP	cell motility	15/122	1471/38701	6.32849e-05	0.00671939
11	GO:0051249	BP	regulation of lymphocyte activation	11/122	830/38701	6.69811e-05	0.00707891
10	GO:0002696	BP	positive regulation of leukocyte activation	10/122	688/38701	6.82733e-05	0.00718222
31	GO:0032879	BP	regulation of localization	31/122	4726/38701	6.876e-05	0.00720024
4	GO:0090175	BP	regulation of establishment of planar polarity	4/122	69/38701	6.93505e-05	0.00721925
3	GO:0050431	MF	transforming growth factor beta binding	3/122	26/38701	7.53593e-05	0.00778418
5	GO:0030516	BP	regulation of axon extension	5/122	137/38701	7.68232e-05	0.00786422
5	GO:2001023	BP	regulation of response to drug	5/122	137/38701	7.68232e-05	0.00786422
4	GO:0045773	BP	positive regulation of axon extension	4/122	71/38701	7.75671e-05	0.00790492
9	GO:0097305	BP	response to alcohol	9/122	565/38701	8.00295e-05	0.00811961
9	GO:0071496	BP	cellular response to external stimulus	9/122	566/38701	8.11097e-05	0.0081928
22	GO:0019220	BP	regulation of phosphate metabolic process	22/122	2864/38701	8.40732e-05	0.00845473
22	GO:0051174	BP	regulation of phosphorus metabolic process	22/122	2865/38701	8.45032e-05	0.00846069
6	GO:0030178	BP	negative regulation of Wnt signaling pathway	6/122	230/38701	9.3951e-05	0.00932484
11	GO:0051272	BP	positive regulation of cellular component movement	11/122	864/38701	9.5488e-05	0.00943636
2	GO:1904956	BP	regulation of midbrain dopaminergic neuron differentiation	2/122	5/38701	9.79527e-05	0.00963821
11	GO:0040017	BP	positive regulation of locomotion	11/122	870/38701	0.000101468	0.00994128
4	GO:0032873	BP	negative regulation of stress-activated MAPK cascade	4/122	77/38701	0.000106471	0.0103427
4	GO:0070303	BP	negative regulation of stress-activated protein kinase signaling cascade	4/122	77/38701	0.000106471	0.0103427
7	GO:0060828	BP	regulation of canonical Wnt signaling pathway	7/122	340/38701	0.000107212	0.0103705
31	GO:0065009	BP	regulation of molecular function	31/122	4899/38701	0.000107947	0.0103975
12	GO:0050865	BP	regulation of cell activation	12/122	1035/38701	0.000110089	0.0105593
8	GO:0031668	BP	cellular response to extracellular stimulus	8/122	461/38701	0.000112389	0.0107348
3	GO:0008347	BP	glial cell migration	3/122	30/38701	0.000116598	0.0110904
7	GO:0050851	BP	antigen receptor-mediated signaling pathway	7/122	345/38701	0.000117329	0.0111136
35	GO:0042221	BP	response to chemical	35/122	5867/38701	0.000119494	0.0112719
4	GO:0045600	BP	positive regulation of fat cell differentiation	4/122	80/38701	0.000123531	0.0116048
7	GO:0003002	BP	regionalization	7/122	350/38701	0.000128209	0.0119949
3	GO:0030020	MF	extracellular matrix structural constituent conferring tensile strength	3/122	31/38701	0.000128794	0.0120005
7	GO:0032872	BP	regulation of stress-activated MAPK cascade	7/122	351/38701	0.000130481	0.0121082
12	GO:0007154	BP	cell communication	12/122	1058/38701	0.000135058	0.0124822
121	GO:0008150	BP	biological_process	121/122	35013/38701	0.000139294	0.0128218
7	GO:0070302	BP	regulation of stress-activated protein kinase signaling cascade	7/122	355/38701	0.000139895	0.0128254
5	GO:0061387	BP	regulation of extent of cell growth	5/122	156/38701	0.000141512	0.0129218
6	GO:1903707	BP	negative regulation of hemopoiesis	6/122	250/38701	0.000148016	0.0133811
6	GO:0043409	BP	negative regulation of MAPK cascade	6/122	250/38701	0.000148016	0.0133811
47	GO:0016043	BP	cellular component organization	47/122	8995/38701	0.000148301	0.0133811
8	GO:0040013	BP	negative regulation of locomotion	8/122	481/38701	0.000150229	0.0135017
3	GO:0001968	MF	fibronectin binding	3/122	33/38701	0.000155612	0.0138222
3	GO:0005520	MF	insulin-like growth factor binding	3/122	33/38701	0.000155612	0.0138222
5	GO:0048640	BP	negative regulation of developmental growth	5/122	160/38701	0.00015927	0.0140923
12	GO:0120035	BP	regulation of plasma membrane bounded cell projection organization	12/122	1084/38701	0.000169	0.0148955
3	GO:0035116	BP	embryonic hindlimb morphogenesis	3/122	34/38701	0.000170279	0.0149505
9	GO:0001558	BP	regulation of cell growth	9/122	627/38701	0.000174752	0.0152261
48	GO:0048522	BP	positive regulation of cellular process	48/122	9326/38701	0.000179566	0.015527
6	GO:2000027	BP	regulation of animal organ morphogenesis	6/122	260/38701	0.000183	0.0157642
12	GO:0031344	BP	regulation of cell projection organization	12/122	1094/38701	0.000183874	0.01578
4	GO:0030858	BP	positive regulation of epithelial cell differentiation	4/122	90/38701	0.000194792	0.0165922
4	GO:0002762	BP	negative regulation of myeloid leukocyte differentiation	4/122	90/38701	0.000194792	0.0165922
10	GO:0030335	BP	positive regulation of cell migration	10/122	785/38701	0.000199431	0.016897
5	GO:0045598	BP	regulation of fat cell differentiation	5/122	168/38701	0.000199851	0.016897
3	GO:2000668	BP	regulation of dendritic cell apoptotic process	3/122	36/38701	0.000202242	0.0170361
2	GO:1903348	BP	positive regulation of bicellular tight junction assembly	2/122	7/38701	0.000204852	0.017067
2	GO:0072203	BP	cell proliferation involved in metanephros development	2/122	7/38701	0.000204852	0.017067
2	GO:0051045	BP	negative regulation of membrane protein ectodomain proteolysis	2/122	7/38701	0.000204852	0.017067
5	GO:0001764	BP	neuron migration	5/122	171/38701	0.000216942	0.0179433
3	GO:0045671	BP	negative regulation of osteoclast differentiation	3/122	37/38701	0.000219582	0.0180961
13	GO:0050767	BP	regulation of neurogenesis	13/122	1290/38701	0.000224955	0.0184722
3	GO:0019228	BP	neuronal action potential	3/122	39/38701	0.000257085	0.0209598
4	GO:0030500	BP	regulation of bone mineralization	4/122	97/38701	0.000259693	0.0210971
7	GO:0030336	BP	negative regulation of cell migration	7/122	396/38701	0.000272137	0.0216804
2	GO:0060346	BP	bone trabecula formation	2/122	8/38701	0.000272572	0.0216804
2	GO:0060638	BP	mesenchymal-epithelial cell signaling	2/122	8/38701	0.000272572	0.0216804
2	GO:1904338	BP	regulation of dopaminergic neuron differentiation	2/122	8/38701	0.000272572	0.0216804
2	GO:0060028	BP	convergent extension involved in axis elongation	2/122	8/38701	0.000272572	0.0216804
2	GO:0072171	BP	mesonephric tubule morphogenesis	2/122	8/38701	0.000272572	0.0216804
11	GO:0002694	BP	regulation of leukocyte activation	11/122	977/38701	0.000276046	0.0218805
4	GO:0060070	BP	canonical Wnt signaling pathway	4/122	100/38701	0.000291771	0.0229674
22	GO:0031399	BP	regulation of protein modification process	22/122	3097/38701	0.00029467	0.0230368
8	GO:0050678	BP	regulation of epithelial cell proliferation	8/122	537/38701	0.000315303	0.0244821
22	GO:0071310	BP	cellular response to organic substance	22/122	3119/38701	0.000318623	0.024656
4	GO:0030326	BP	embryonic limb morphogenesis	4/122	104/38701	0.000338838	0.0260438
4	GO:0035113	BP	embryonic appendage morphogenesis	4/122	104/38701	0.000338838	0.0260438
3	GO:0010453	BP	regulation of cell fate commitment	3/122	43/38701	0.000343984	0.0263483
2	GO:0010193	BP	response to ozone	2/122	9/38701	0.000349726	0.0263483
2	GO:0042661	BP	regulation of mesodermal cell fate specification	2/122	9/38701	0.000349726	0.0263483
2	GO:0045137	BP	development of primary sexual characteristics	2/122	9/38701	0.000349726	0.0263483
2	GO:0010966	BP	regulation of phosphate transport	2/122	9/38701	0.000349726	0.0263483
2	GO:0044224	CC	juxtaparanode region of axon	2/122	9/38701	0.000349726	0.0263483
6	GO:0030307	BP	positive regulation of cell growth	6/122	295/38701	0.000359603	0.0269148
3	GO:0071772	BP	response to BMP	3/122	44/38701	0.000368307	0.0273497
3	GO:0071773	BP	cellular response to BMP stimulus	3/122	44/38701	0.000368307	0.0273497
15	GO:0042327	BP	positive regulation of phosphorylation	15/122	1731/38701	0.000369862	0.0273497
13	GO:0071495	BP	cellular response to endogenous stimulus	13/122	1359/38701	0.000370206	0.0273497
83	GO:0050789	BP	regulation of biological process	83/122	20131/38701	0.000372733	0.0274476
8	GO:0070848	BP	response to growth factor	8/122	553/38701	0.000383104	0.0280304
7	GO:0030111	BP	regulation of Wnt signaling pathway	7/122	421/38701	0.00039289	0.0286546
7	GO:2000146	BP	negative regulation of cell motility	7/122	423/38701	0.00040415	0.029382
5	GO:0030856	BP	regulation of epithelial cell differentiation	5/122	197/38701	0.000415806	0.0301334
11	GO:0040008	BP	regulation of growth	11/122	1027/38701	0.000420133	0.0302979
20	GO:0010647	BP	positive regulation of cell communication	20/122	2674/38701	0.000420996	0.0302979
13	GO:0043549	BP	regulation of kinase activity	13/122	1378/38701	0.000422057	0.0302979
11	GO:0009991	BP	response to extracellular stimulus	11/122	1029/38701	0.000427009	0.0305573
20	GO:0023056	BP	positive regulation of signaling	20/122	2687/38701	0.000431268	0.0306426
2	GO:0033622	BP	integrin activation	2/122	10/38701	0.000436255	0.0306426
2	GO:1905902	BP	regulation of mesoderm formation	2/122	10/38701	0.000436255	0.0306426
2	GO:0072111	BP	cell proliferation involved in kidney development	2/122	10/38701	0.000436255	0.0306426
2	GO:1905770	BP	regulation of mesodermal cell differentiation	2/122	10/38701	0.000436255	0.0306426
2	GO:0048251	BP	elastic fiber assembly	2/122	10/38701	0.000436255	0.0306426
3	GO:0060349	BP	bone morphogenesis	3/122	47/38701	0.000447833	0.0313061
10	GO:0032989	BP	cellular component morphogenesis	10/122	870/38701	0.000448444	0.0313061
12	GO:0045859	BP	regulation of protein kinase activity	12/122	1211/38701	0.000459669	0.0319919
24	GO:0070887	BP	cellular response to chemical stimulus	24/122	3635/38701	0.000463592	0.0321245
7	GO:0045927	BP	positive regulation of growth	7/122	433/38701	0.000464389	0.0321245
18	GO:0044877	MF	protein-containing complex binding	18/122	2374/38701	0.000468599	0.0323178
3	GO:0002062	BP	chondrocyte differentiation	3/122	48/38701	0.000476594	0.0327701
4	GO:0070167	BP	regulation of biomineral tissue development	4/122	114/38701	0.000479966	0.0328066
18	GO:0042592	BP	homeostatic process	18/122	2379/38701	0.000480375	0.0328066
10	GO:0033674	BP	positive regulation of kinase activity	10/122	878/38701	0.000481436	0.0328066
7	GO:0002429	BP	immune response-activating cell surface receptor signaling pathway	7/122	436/38701	0.000483794	0.0328692
6	GO:0050679	BP	positive regulation of epithelial cell proliferation	6/122	313/38701	0.000491525	0.0332954
11	GO:0048646	BP	anatomical structure formation involved in morphogenesis	11/122	1047/38701	0.000493271	0.0333147
8	GO:0048545	BP	response to steroid hormone	8/122	576/38701	0.00050096	0.0337343
7	GO:0031960	BP	response to corticosteroid	7/122	439/38701	0.000503841	0.0338284
2	GO:0048050	BP	post-embryonic eye morphogenesis	2/122	11/38701	0.000532101	0.035517
2	GO:0072178	BP	nephric duct morphogenesis	2/122	11/38701	0.000532101	0.035517
13	GO:0051960	BP	regulation of nervous system development	13/122	1422/38701	0.000566364	0.0376937
5	GO:0014823	BP	response to activity	5/122	212/38701	0.000580184	0.0383971
14	GO:0001934	BP	positive regulation of protein phosphorylation	14/122	1614/38701	0.000580296	0.0383971
7	GO:0010769	BP	regulation of cell morphogenesis involved in differentiation	7/122	450/38701	0.000583085	0.0384701
30	GO:0010033	BP	response to organic substance	30/122	5038/38701	0.000599864	0.0394631
3	GO:0035137	BP	hindlimb morphogenesis	3/122	52/38701	0.000603405	0.039582
8	GO:0036293	BP	response to decreased oxygen levels	8/122	594/38701	0.000612404	0.0400572
4	GO:0050795	BP	regulation of behavior	4/122	122/38701	0.000619661	0.0404161
2	GO:1903237	BP	negative regulation of leukocyte tethering or rolling	2/122	12/38701	0.000637204	0.0410867
2	GO:0001823	BP	mesonephros development	2/122	12/38701	0.000637204	0.0410867
2	GO:0010881	BP	regulation of cardiac muscle contraction by regulation of the release of sequestered calcium ion	2/122	12/38701	0.000637204	0.0410867
30	GO:0048869	BP	cellular developmental process	30/122	5087/38701	0.000638851	0.0410867
4	GO:0045778	BP	positive regulation of ossification	4/122	123/38701	0.000638943	0.0410867
47	GO:0071840	BP	cellular component organization or biogenesis	47/122	9458/38701	0.000646361	0.0412377
7	GO:0002768	BP	immune response-regulating cell surface receptor signaling pathway	7/122	458/38701	0.00064671	0.0412377
10	GO:0010720	BP	positive regulation of cell development	10/122	914/38701	0.000655945	0.0417101
25	GO:0051128	BP	regulation of cellular component organization	25/122	3876/38701	0.000671042	0.0425515
16	GO:0006928	BP	movement of cell or subcellular component	16/122	2036/38701	0.00067853	0.0428428
6	GO:0090257	BP	regulation of muscle system process	6/122	333/38701	0.00067939	0.0428428
85	GO:0065007	BP	biological regulation	85/122	21079/38701	0.000705962	0.0442739
4	GO:0030509	BP	BMP signaling pathway	4/122	127/38701	0.000720339	0.0450518
14	GO:0008284	BP	positive regulation of cell population proliferation	14/122	1651/38701	0.000723641	0.0451347
15	GO:0010562	BP	positive regulation of phosphorus metabolic process	15/122	1852/38701	0.000743012	0.045993
15	GO:0045937	BP	positive regulation of phosphate metabolic process	15/122	1852/38701	0.000743012	0.045993
3	GO:0016358	BP	dendrite development	3/122	56/38701	0.00074994	0.045993
3	GO:0001656	BP	metanephros development	3/122	56/38701	0.00074994	0.045993
2	GO:2000650	BP	negative regulation of sodium ion transmembrane transporter activity	2/122	13/38701	0.000751506	0.045993
2	GO:0090179	BP	planar cell polarity pathway involved in neural tube closure	2/122	13/38701	0.000751506	0.045993
2	GO:0071481	BP	cellular response to X-ray	2/122	13/38701	0.000751506	0.045993
4	GO:0050772	BP	positive regulation of axonogenesis	4/122	129/38701	0.000763669	0.0466124
5	GO:0048871	BP	multicellular organismal homeostasis	5/122	226/38701	0.000773671	0.047097
6	GO:0050920	BP	regulation of chemotaxis	6/122	342/38701	0.000780182	0.047367
6	GO:0071229	BP	cellular response to acid chemical	6/122	343/38701	0.000792057	0.0479604

## Sheet: Table S8
Table S8. Enriched GO terms in colitis mice upon Amuc_1100 treatment
Number	GO ID	Term Type	Description	Ratio_in_study	Ratio_in_pop	Pvalue	Padjust
8	GO:0050871	BP	positive regulation of B cell activation	8/28	276/38701	4.1145e-08	0.000297571
8	GO:0002253	BP	activation of immune response	8/28	791/38701	6.36323e-08	0.000297571
9	GO:0051249	BP	regulation of lymphocyte activation	9/28	830/38701	9.19866e-08	0.000297571
8	GO:0002757	BP	immune response-activating signal transduction	8/28	548/38701	1.00517e-07	0.000297571
8	GO:0006959	BP	humoral immune response	8/28	852/38701	1.12342e-07	0.000297571
8	GO:0002764	BP	immune response-regulating signaling pathway	8/28	572/38701	1.34356e-07	0.000297571
8	GO:0050851	BP	antigen receptor-mediated signaling pathway	8/28	345/38701	1.53424e-07	0.000297571
8	GO:0050864	BP	regulation of B cell activation	8/28	349/38701	1.64172e-07	0.000297571
8	GO:0051251	BP	positive regulation of lymphocyte activation	8/28	593/38701	1.71422e-07	0.000297571
8	GO:0045087	BP	innate immune response	8/28	908/38701	1.82495e-07	0.000297571
8	GO:0042571	CC	immunoglobulin complex, circulating	8/28	166/38701	1.24006e-07	0.000297571
8	GO:0003823	MF	antigen binding	8/28	270/38701	3.61234e-08	0.000297571
8	GO:0034987	MF	immunoglobulin receptor binding	8/28	173/38701	1.523e-07	0.000297571
14	GO:0005102	MF	signaling receptor binding	14/28	2771/38701	1.82345e-07	0.000297571
8	GO:0006910	BP	phagocytosis, recognition	8/28	182/38701	1.95953e-07	0.000298214
9	GO:0009617	BP	response to bacterium	9/28	932/38701	2.22521e-07	0.000298807
9	GO:0098552	CC	side of membrane	9/28	925/38701	2.10135e-07	0.000298807
8	GO:0008037	BP	cell recognition	8/28	377/38701	2.58133e-07	0.00032737
8	GO:0042742	BP	defense response to bacterium	8/28	642/38701	2.92691e-07	0.000351661
9	GO:0002694	BP	regulation of leukocyte activation	9/28	977/38701	3.18182e-07	0.000363173
8	GO:0050853	BP	B cell receptor signaling pathway	8/28	204/38701	3.45e-07	0.000375031
8	GO:0006958	BP	complement activation, classical pathway	8/28	213/38701	4.27109e-07	0.000401054
13	GO:0048584	BP	positive regulation of response to stimulus	13/28	3650/38701	4.37997e-07	0.000401054
8	GO:0006911	BP	phagocytosis, engulfment	8/28	215/38701	4.47296e-07	0.000401054
8	GO:0002696	BP	positive regulation of leukocyte activation	8/28	688/38701	4.65752e-07	0.000401054
8	GO:0002252	BP	immune effector process	8/28	1030/38701	4.74349e-07	0.000401054
8	GO:0019814	CC	immunoglobulin complex	8/28	209/38701	3.88901e-07	0.000401054
9	GO:0050865	BP	regulation of cell activation	9/28	1035/38701	4.92e-07	0.00040112
9	GO:0061024	BP	membrane organization	9/28	1044/38701	5.25193e-07	0.000413418
8	GO:0050867	BP	positive regulation of cell activation	8/28	710/38701	5.75005e-07	0.00043754
8	GO:0002429	BP	immune response-activating cell surface receptor signaling pathway	8/28	436/38701	6.03285e-07	0.000444251
8	GO:0099024	BP	plasma membrane invagination	8/28	231/38701	6.3743e-07	0.000454726
8	GO:0006956	BP	complement activation	8/28	233/38701	6.65096e-07	0.000460085
9	GO:0009897	CC	external side of plasma membrane	9/28	731/38701	6.98678e-07	0.0004691
8	GO:0010324	BP	membrane invagination	8/28	238/38701	7.38428e-07	0.000481624
8	GO:0002768	BP	immune response-regulating cell surface receptor signaling pathway	8/28	458/38701	8.03226e-07	0.000509334
16	GO:0044421	CC	extracellular region part	16/28	3916/38701	9.86055e-07	0.00060837
10	GO:0006955	BP	immune response	10/28	2119/38701	1.25192e-06	0.00074618
9	GO:0050776	BP	regulation of immune response	9/28	1617/38701	1.27479e-06	0.00074618
2	GO:0098898	CC	dense core granule lumen	2/28	3/38701	1.51361e-06	0.000842751
2	GO:0099013	CC	neuronal dense core vesicle lumen	2/28	3/38701	1.51361e-06	0.000842751
8	GO:0050778	BP	positive regulation of immune response	8/28	1295/38701	2.63045e-06	0.00140026
10	GO:0006952	BP	defense response	10/28	2301/38701	2.63761e-06	0.00140026
9	GO:0002684	BP	positive regulation of immune system process	9/28	1802/38701	3.11289e-06	0.00161503
13	GO:0044459	CC	plasma membrane part	13/28	4396/38701	3.67355e-06	0.00186355
2	GO:0031632	BP	positive regulation of synaptic vesicle fusion to presynaptic active zone membrane	2/28	5/38701	5.04086e-06	0.00244836
2	GO:0045098	CC	type III intermediate filament	2/28	5/38701	5.04086e-06	0.00244836
10	GO:0002682	BP	regulation of immune system process	10/28	2521/38701	5.97162e-06	0.00284
2	GO:0001515	MF	opioid peptide activity	2/28	6/38701	7.55791e-06	0.00345064
10	GO:0007166	BP	cell surface receptor signaling pathway	10/28	2639/38701	8.9593e-06	0.00401025
9	GO:0051707	BP	response to other organism	9/28	2168/38701	1.39458e-05	0.0061222
11	GO:0002376	BP	immune system process	11/28	3463/38701	1.47249e-05	0.00634228
4	GO:0050806	BP	positive regulation of synaptic transmission	4/28	212/38701	1.61641e-05	0.00683324
8	GO:0098542	BP	defense response to other organism	8/28	1697/38701	1.90216e-05	0.00761798
5	GO:0098793	CC	presynapse	5/28	468/38701	1.97737e-05	0.00778266
11	GO:0009605	BP	response to external stimulus	11/28	3697/38701	2.7333e-05	0.01052
2	GO:2000302	BP	positive regulation of synaptic vesicle exocytosis	2/28	11/38701	2.76503e-05	0.01052
2	GO:0031630	BP	regulation of synaptic vesicle fusion to presynaptic active zone membrane	2/28	12/38701	3.31656e-05	0.0122113
2	GO:0031628	MF	opioid receptor binding	2/28	12/38701	3.31656e-05	0.0122113
9	GO:0043207	BP	response to external biotic stimulus	9/28	2558/38701	5.17436e-05	0.0184563
9	GO:0009607	BP	response to biotic stimulus	9/28	2589/38701	5.68551e-05	0.0199675
2	GO:2000833	BP	positive regulation of steroid hormone secretion	2/28	17/38701	6.81883e-05	0.0235849
2	GO:0031340	BP	positive regulation of vesicle fusion	2/28	18/38701	7.66775e-05	0.0261253
5	GO:0050804	BP	modulation of chemical synaptic transmission	5/28	653/38701	9.5962e-05	0.0317481
3	GO:0007218	BP	neuropeptide signaling pathway	3/28	124/38701	9.91855e-05	0.0322058
5	GO:0099177	BP	regulation of trans-synaptic signaling	5/28	659/38701	0.000100167	0.0322058
2	GO:0071305	BP	cellular response to vitamin D	2/28	23/38701	0.00012651	0.0401107
13	GO:0048583	BP	regulation of response to stimulus	13/28	6145/38701	0.000141062	0.0441119
